# Supplementary material for: Cyclobutane-1,3-Diacid (CBDA): A Semi-Rigid Building Block Prepared by [2+2] Photocyclization for Polymeric Materials
Source: PubMed Central journal article supplement (PMC5651925; doi:10.1038/s41598-017-13983-z), 2017-10-20
Supplement: 41598_2017_13983_MOESM1_ESM.pdf [file 41598_2017_13983_MOESM1_ESM.pdf]

# Cyclobutane-1,3-Diacid (CBDA): A Semi-Rigid Building Block Prepared by [2+2] Photocyclization for Polymeric Materials

Zhihan Wang,<sup>†</sup> Benjamin Miller,<sup>†</sup> Micah Mabin,<sup>†</sup> Rahul Shahni,<sup>†</sup> Zijun D. Wang,<sup>†</sup> Angel Ugrinov,<sup>‡</sup> and Qianli Rick Chu<sup>\*,†</sup>

<sup>†</sup>*Department of Chemistry, University of North Dakota, Grand Forks, ND 58202, USA*

<sup>‡</sup>*Department of Chemistry and Biochemistry, North Dakota State University, Fargo, ND 58102, USA*

## Table of Contents

|                                                                                                                               |    |
|-------------------------------------------------------------------------------------------------------------------------------|----|
| 1. Chemicals and Instruments.....                                                                                             | 2  |
| 2. Crystal Data and Conformations of Cyclobutane Ring.....                                                                    | 3  |
| 2.1. X-ray Single Crystal Structures of <i>trans</i> -Cinnamic Acid, <b>CBDA-1</b> Dibutylamine Salt, and <b>CBDA-1</b> ..... | 3  |
| 2.2. <b>CBDA-1</b> and its Five Possible Stereoisomers.....                                                                   | 4  |
| 2.3. Crystal Data of the Cinnamic Acid, $\alpha$ -Truxillic Acid and its Salt.....                                            | 5  |
| 3. Spectra, Data and Images .....                                                                                             | 6  |
| 3.1. Powder X-ray Diffraction of <i>trans</i> -Cinnamic Acid .....                                                            | 6  |
| 3.2. UV-Vis Spectra of <i>trans</i> -Cinnamic Acid, <b>CBDA-1</b> , and Poly- $\alpha$ -Truxillates .....                     | 7  |
| 3.3. NMR Spectra.....                                                                                                         | 8  |
| 3.4. FT-IR of $\alpha$ -Truxillic Acid and Poly- $\alpha$ -Truxillate.....                                                    | 23 |
| 3.5. Powder X-ray Diffraction of Poly- $\alpha$ -Truxillate .....                                                             | 26 |
| 3.6. MS Spectra .....                                                                                                         | 28 |
| 3.7. DSC .....                                                                                                                | 32 |
| 3.8. TGA.....                                                                                                                 | 34 |
| 3.9. PDI .....                                                                                                                | 34 |

## 1. Chemicals and Instruments

All chemicals were purchased from Alfa Aesar, Sigma-Aldrich, or Acros, and used without further purification. The light sources used for the photopolymerization were sunlight or a Hanovia medium pressure mercury lamp (PC 451050, 450 W). The solution phase nuclear magnetic resonance spectra (NMR) were recorded with Bruker AVANCE ( $^1\text{H}$ : 500 MHz,  $^{13}\text{C}$ : 125 MHz). Single crystal X-ray data were recorded on Bruker Apex or Bruker Kappa Apex II Duo X-Ray Diffractometer with Mo  $K\alpha$  ( $\lambda = 0.71073 \text{ \AA}$ ) or Cu  $K\alpha$  ( $\lambda = 1.54178 \text{ \AA}$ ). Infrared spectroscopy (IR) was recorded on Thermo Scientific Nicolet iS5 FT-IR spectrometer. Melting points were measured on a MEL-TEMP device without correction. The mass spectrometric analyses were performed using a high-resolution time of flight G1969A with electrospray (atmospheric pressure chemical) ionization (Agilent, Santa Clara, CA, USA) and reported as  $m/z$  (relative intensity). MALDI was performed on the instrument of Waters SYNAPT G2Si with MALDI source. Differential scanning calorimetry (DSC) was recorded with Perkin Elmer Jade DSC with a ramping rate of  $10 \text{ }^\circ\text{C}/\text{min}$  under nitrogen protection. Heat flow was recorded from both the first and second heating cooling curve. Thermogravimetric analysis (TGA) was performed with TA instrument SDT Q600 at a ramping rate  $20 \text{ }^\circ\text{C}/\text{min}$  under nitrogen atmosphere. Polydispersity indices (PDI) of polymers were obtained by gel permeation chromatography (GPC) equipped with Waters 1515 Isocratic HPLC pump, Styragel HR 4 column, and 2414 refractive index detector with THF as eluent. Monodisperse polystyrene and poly(methyl methacrylate) samples were employed to construct the calibration curve. X-ray Powder Diffraction (XRD) was performed on a X'PERT-PRO X-ray diffractometer (PANalytical, Netherlands) equipped with a 3 KW copper tube X-ray generator of  $\lambda = 0.1541 \text{ nm}$  under 40 mA and 45 KV. Spectra were collected at room temperature in a  $2\theta$  range of  $3\sim 35^\circ$  at a scanning rate of  $3^\circ/\text{min}$ .

## 2. Crystal Data and Conformations of Cyclobutane Ring

### 2.1. X-ray Single Crystal Structures of *trans*-Cinnamic Acid, CBDA-1 Dibutylamine Salt, and CBDA-1.

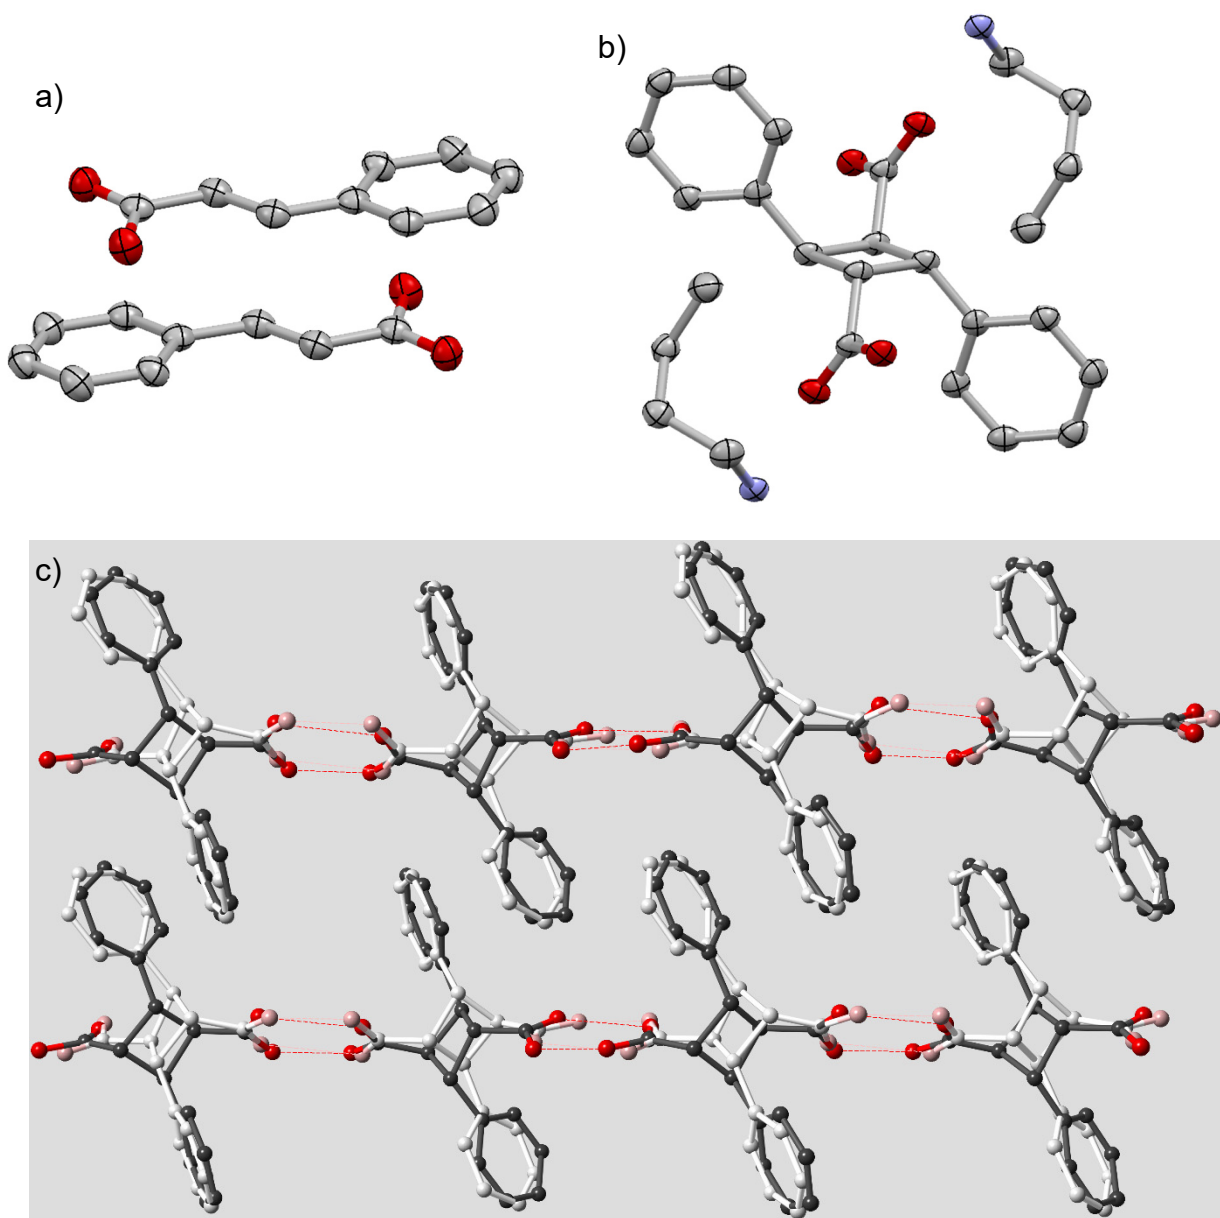

**Figure S1.** ORTEP representation at 50% electron density: (a) Crystal structure of the *trans*-cinnamic acid; (b) Crystal structure of the CBDA-1 dibutylamine salt ( $\alpha$ -truxillate dibutylaminium); (c) The packing the CBDA-1 in the its pure crystal form with disorder (The hydrogen bonds are shown in red and pink).

## 2.2. CBDA-1 and its Five Possible Stereoisomers

Truxillic acid:

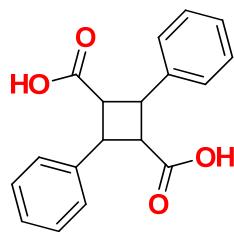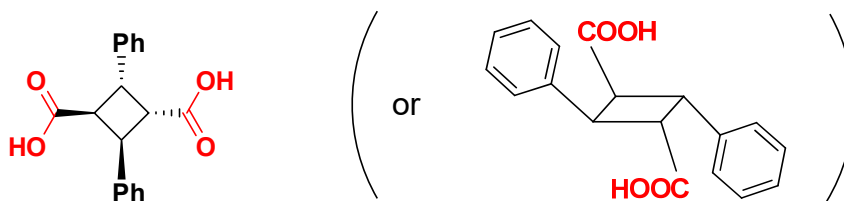

CBDA-1 ( $\alpha$ -truxillic acid)

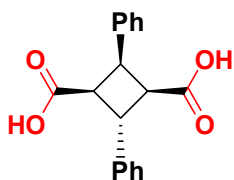

$\gamma$ -truxillic acid

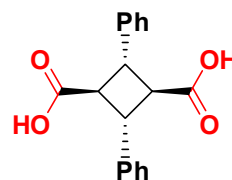

$\epsilon$ -truxillic acid

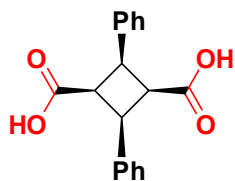

*peri*-truxillic acid

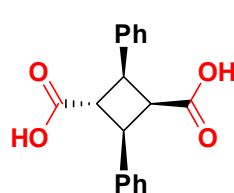

*epi*-truxillic acid

**Figure S2.** Truxillic acid: Chemical structures of **CBDA-1** ( $\alpha$ -truxillic acid, prepared from *trans*-cinnamic acid), and the other four possible stereoisomers of truxillic acid.

### 2.3. Crystal Data of the Cinnamic Acid, $\alpha$ -Truxillic Acid and its Salt

**Table S1.** Crystal data

| <b>Crystals</b>                                           | <i>trans</i> -Cinnamic acid                  | <b>CBDA-1<sup>a</sup></b><br>( $\alpha$ -Truxillic acid) | <b>CBDA-1 Salt</b><br>( $\alpha$ -Truxillate-<br>dibutylaminiun) |
|-----------------------------------------------------------|----------------------------------------------|----------------------------------------------------------|------------------------------------------------------------------|
| <b>CCDC #</b>                                             | 1547787                                      | 986274                                                   | 1547788                                                          |
| <b>Formula</b>                                            | C <sub>9</sub> H <sub>8</sub> O <sub>2</sub> | C <sub>18</sub> H <sub>16</sub> O <sub>4</sub>           | C <sub>26</sub> H <sub>38</sub> N <sub>2</sub> O <sub>4</sub>    |
| <b>FW</b>                                                 | 148.15                                       | 294.29                                                   | 442.58                                                           |
| <b>Cryst. Size [mm]</b>                                   | 0.22, 0.17,<br>0.06                          | 0.22, 0.05,<br>0.02                                      | 0.28, 0.13,<br>0.07                                              |
| <b>Space Group, Z</b>                                     | P21/n                                        | C2/c                                                     | P -1                                                             |
| <b>a (Å)</b>                                              | 5.5531(4)                                    | 15.7822(6)                                               | 6.1667(5)                                                        |
| <b>b (Å)</b>                                              | 17.5178(13)                                  | 5.6013(2)                                                | 9.3491(6)                                                        |
| <b>c (Å)</b>                                              | 7.7056(6)                                    | 16.2750(5)                                               | 10.8378(9)                                                       |
| <b><math>\alpha</math> (°)</b>                            | 90                                           | 90                                                       | 98.608(5)                                                        |
| <b><math>\beta</math> (°)</b>                             | 96.267(6)                                    | 99.255(3)                                                | 91.191(7)                                                        |
| <b><math>\gamma</math> (°)</b>                            | 90                                           | 90                                                       | 96.935(5)                                                        |
| <b>V (Å<sup>3</sup>)</b>                                  | 745.11(10)                                   | 1420.00(9)                                               | 612.79(8)                                                        |
| <b>Temp. (K)</b>                                          | 103(2)                                       | 100(2)                                                   | 100(2)                                                           |
| <b><math>\rho_{\text{calc}}</math> [g/cm<sup>3</sup>]</b> | 1.321                                        | 1.377                                                    | 1.199                                                            |
| <b><math>\mu</math> [mm<sup>-1</sup>]</b>                 | 0.764                                        | 0.801                                                    | 0.640                                                            |
| <b>Radiation Type</b>                                     | Cu                                           | Cu                                                       | Cu                                                               |
| <b>F(000)</b>                                             | 312.0                                        | 616.0                                                    | 240.0                                                            |
| <b>No of measured refl.</b>                               | 3308                                         | 4256                                                     | 7270                                                             |
| <b>No of independent refl.</b>                            | 1237                                         | 1231                                                     | 2108                                                             |
| <b>No of refl. (<math>I \geq 2\sigma</math>)</b>          | 1016                                         | 1091                                                     | 1751                                                             |
| <b>R1/wR2 (<math>I \geq 2\sigma</math>) [%]</b>           | 4.07/11.12                                   | 5.02/13.45                                               | 8.40/22.84                                                       |
| <b>R1/wR2 (all data) [%]</b>                              | 4.95/11.75                                   | 5.57/13.82                                               | 9.37/24.31                                                       |

a) Data from our recent publication: Wang, Z.; Randazzo, K.; Hou, X.; Simpson, J.; Struppe, J.; Ugrinov, A.; Kastern, B.; Wysocki, E.; Chu, Q. R. **2015**, *48(9)*, 2894-2900.

### 3. Spectra, Data and Images

#### 3.1. Powder X-ray Diffraction of *trans*-Cinnamic Acid

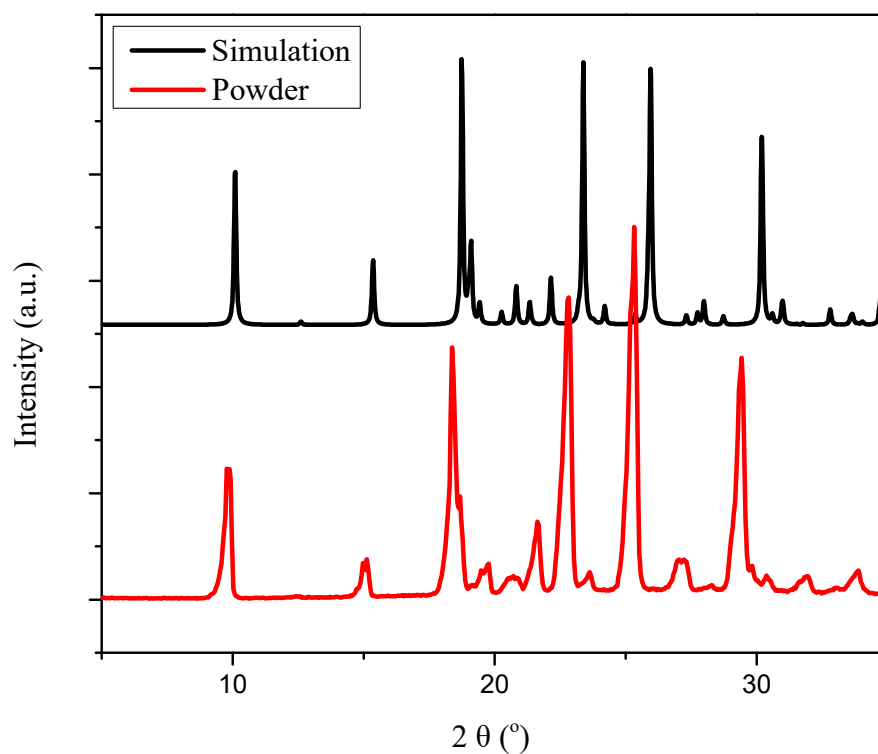

**Figure S3.** Comparison of the calculated Powder X-ray Diffraction (PXRD) pattern based on single crystal structure of the  $\alpha$  form *trans*-cinnamic acid (black line) and the one of the commercially available *trans*-cinnamic acid powder (red line).

### 3.2. UV-Vis Spectra of *trans*-Cinnamic Acid, CBDA-1, and Poly- $\alpha$ -Truxillates

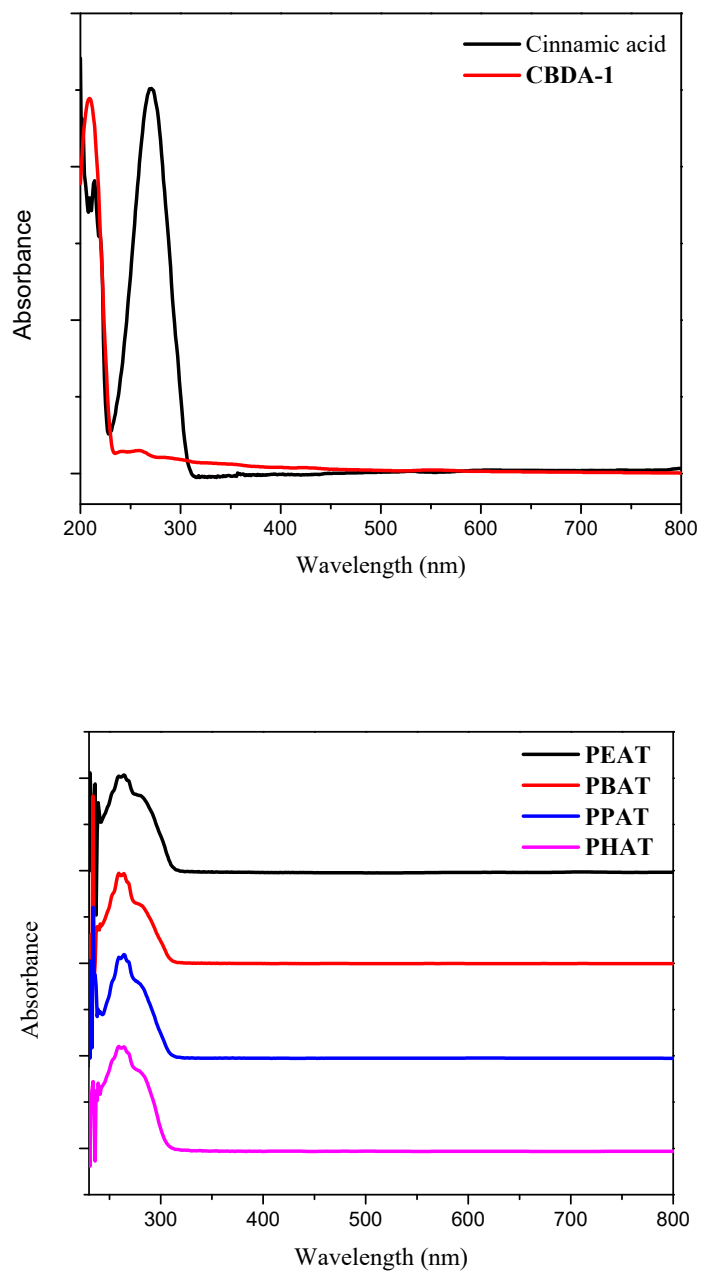

**Figure S4.** UV-Vis spectra of *trans*-cinnamic acid and **CBDA-1** in ethanol (up) and poly- $\alpha$ -truxillates in chloroform (down).

### 3.3. NMR Spectra

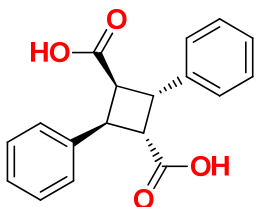

**CBDA-1** ( $\alpha$ -truxillic acid)

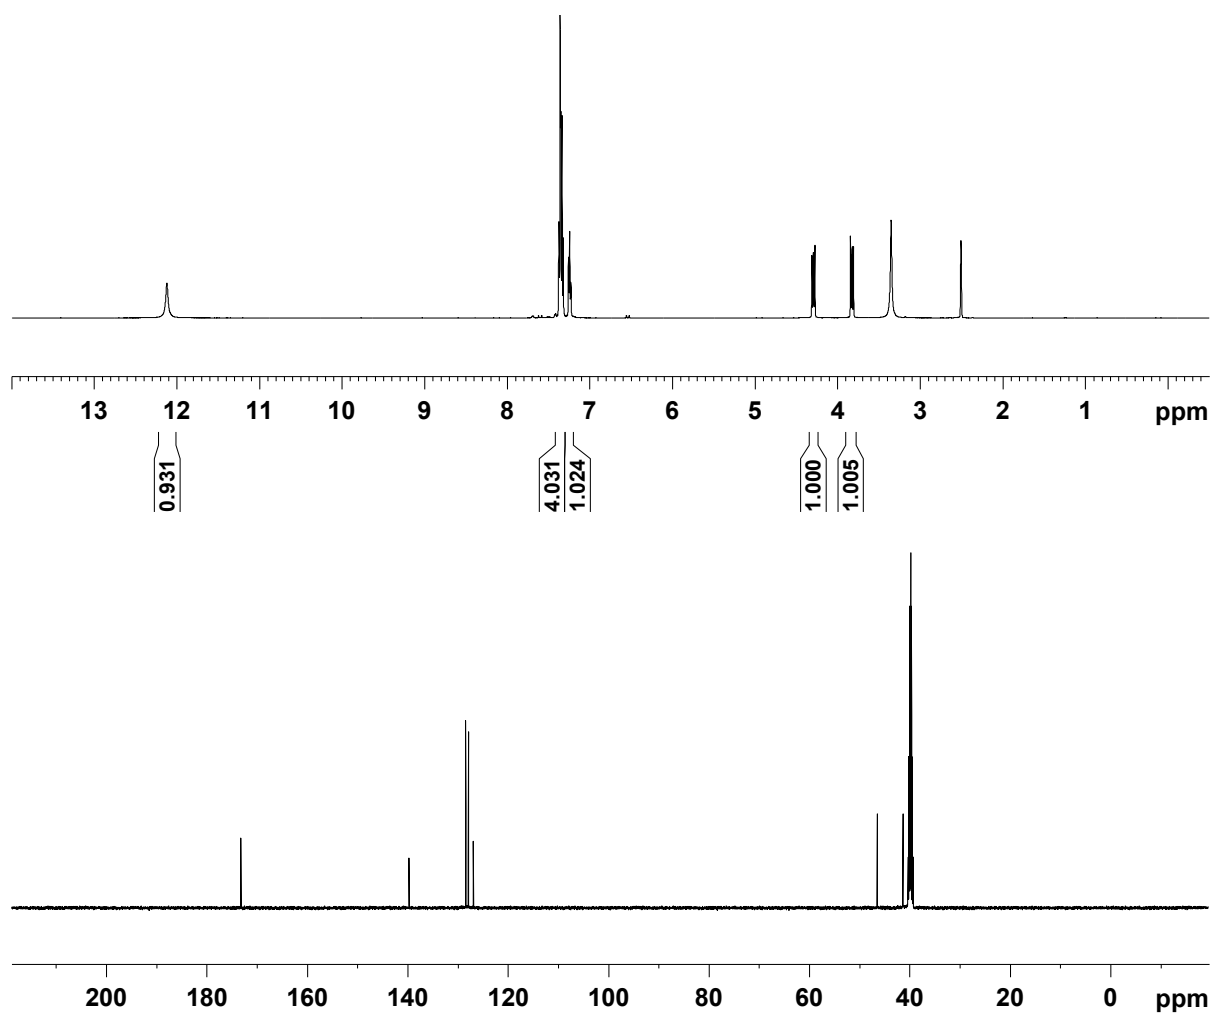

**Figure S5.**  $^1\text{H}$  (a) and  $^{13}\text{C}$  (b) NMR spectra of **CBDA-1** ( $\alpha$ -truxillic acid) in  $\text{DMSO-}d_6$  at room temperature.



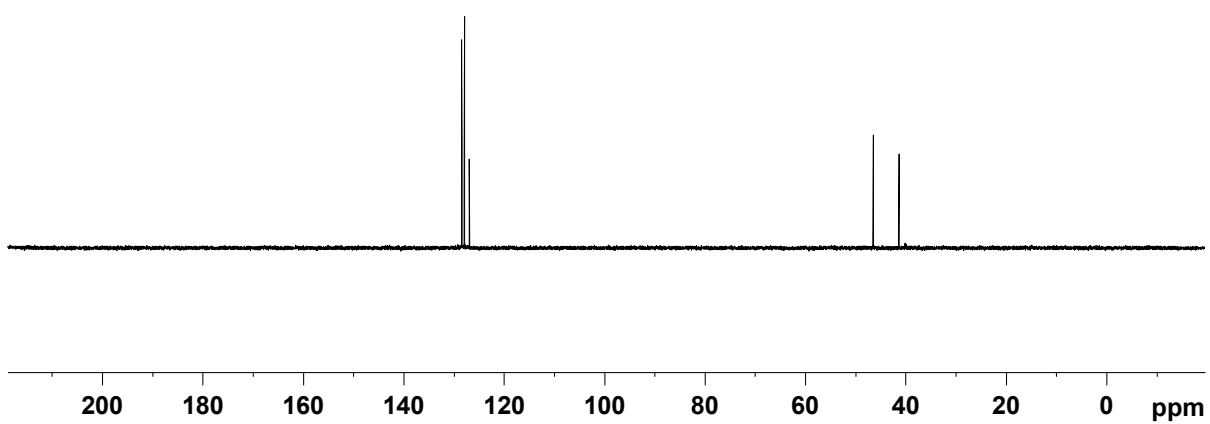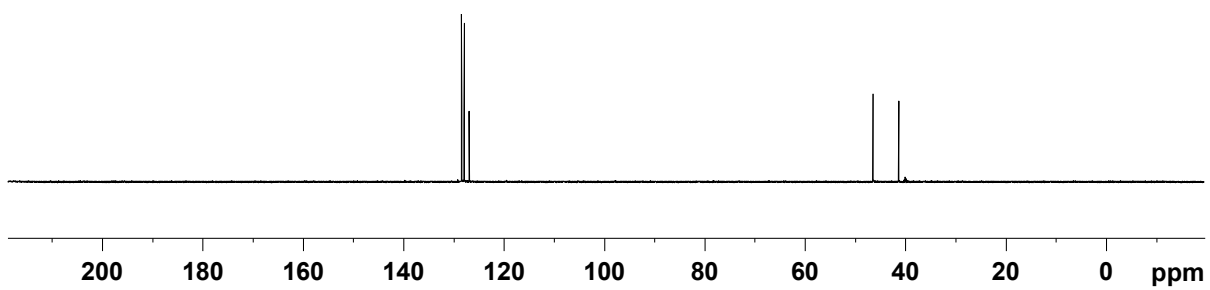

**Figure S5 Continue.** DEPT 135 (c) and DEPT 90 (d) <sup>13</sup>C NMR spectura of **CBDA-1** in DMSO-*d*<sub>6</sub> at room temperature.

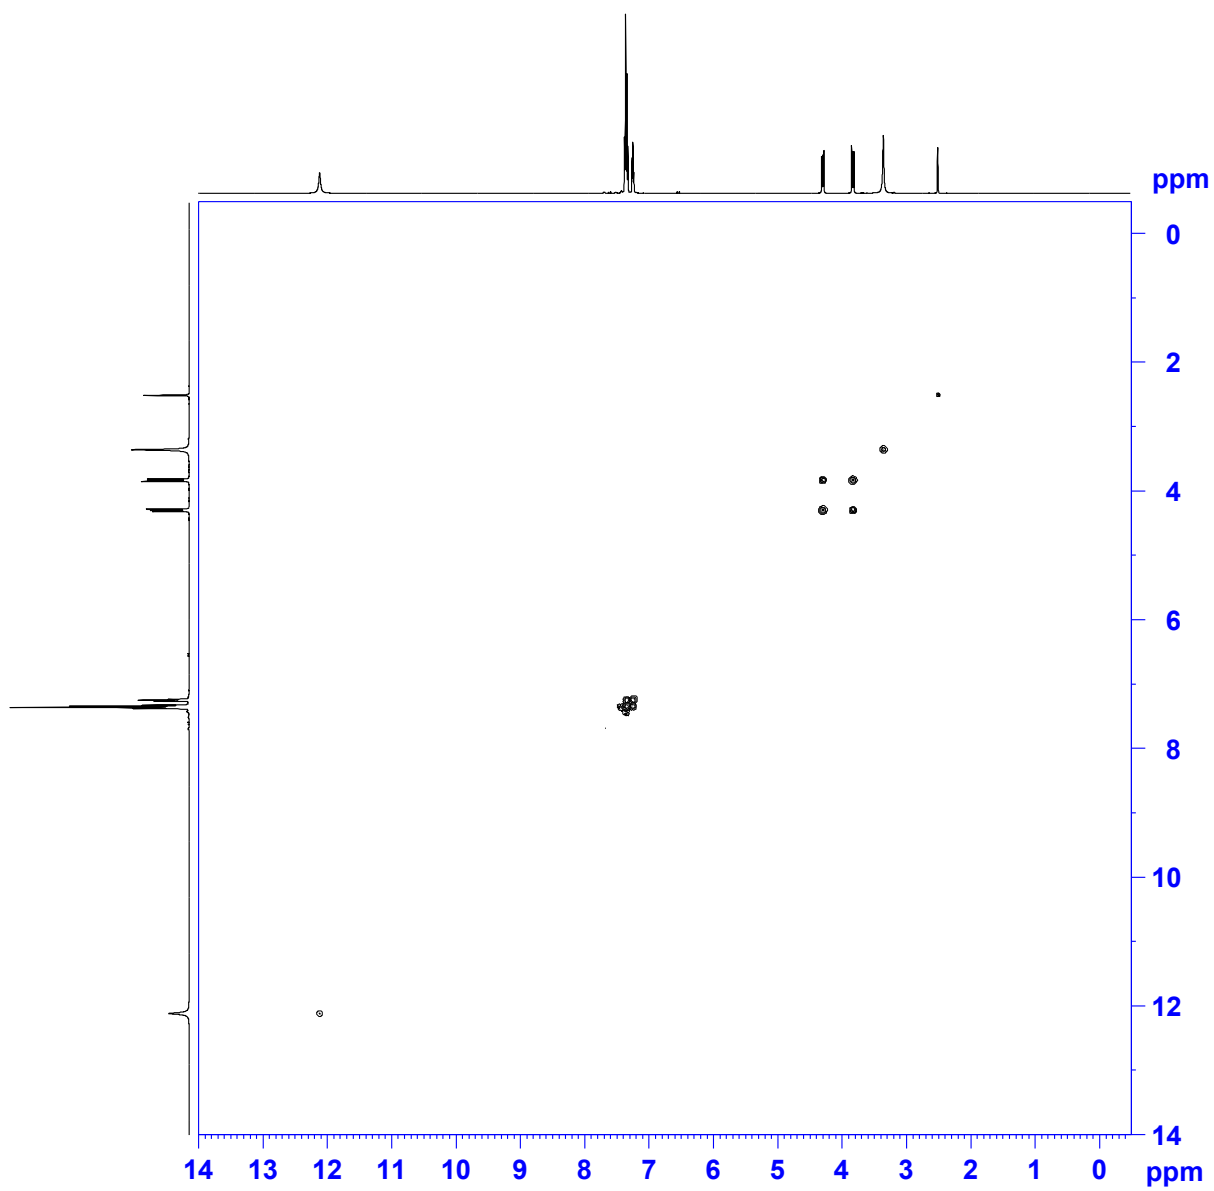

**Figure S5 Continue.** COSY NMR spectrum of **CBDA-1** in DMSO-*d*<sub>6</sub> at room temperature.

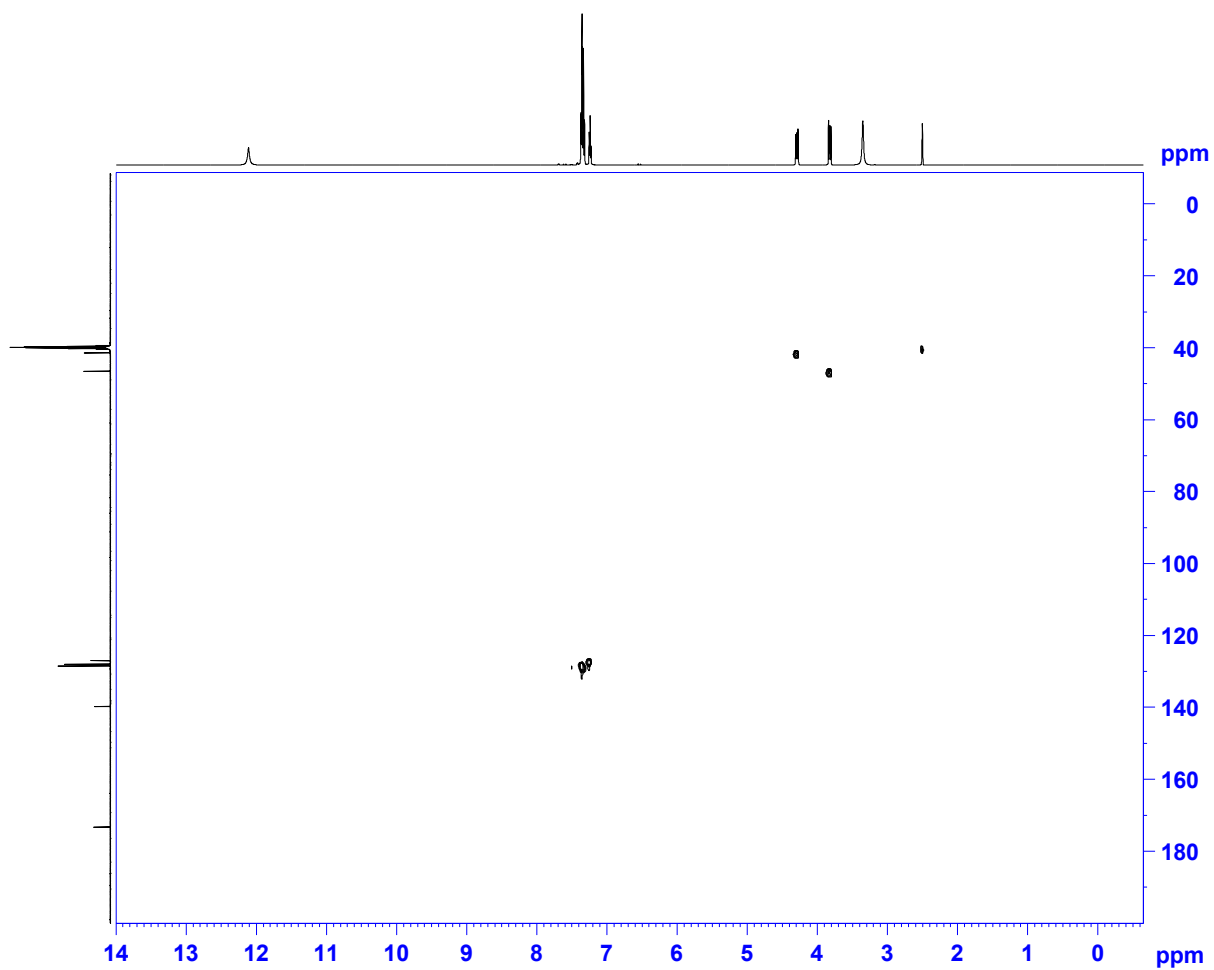

**Figure S5 Continue.** HSQC NMR spectrum of **CBDA-1** in  $\text{DMSO-}d_6$  at room temperature.

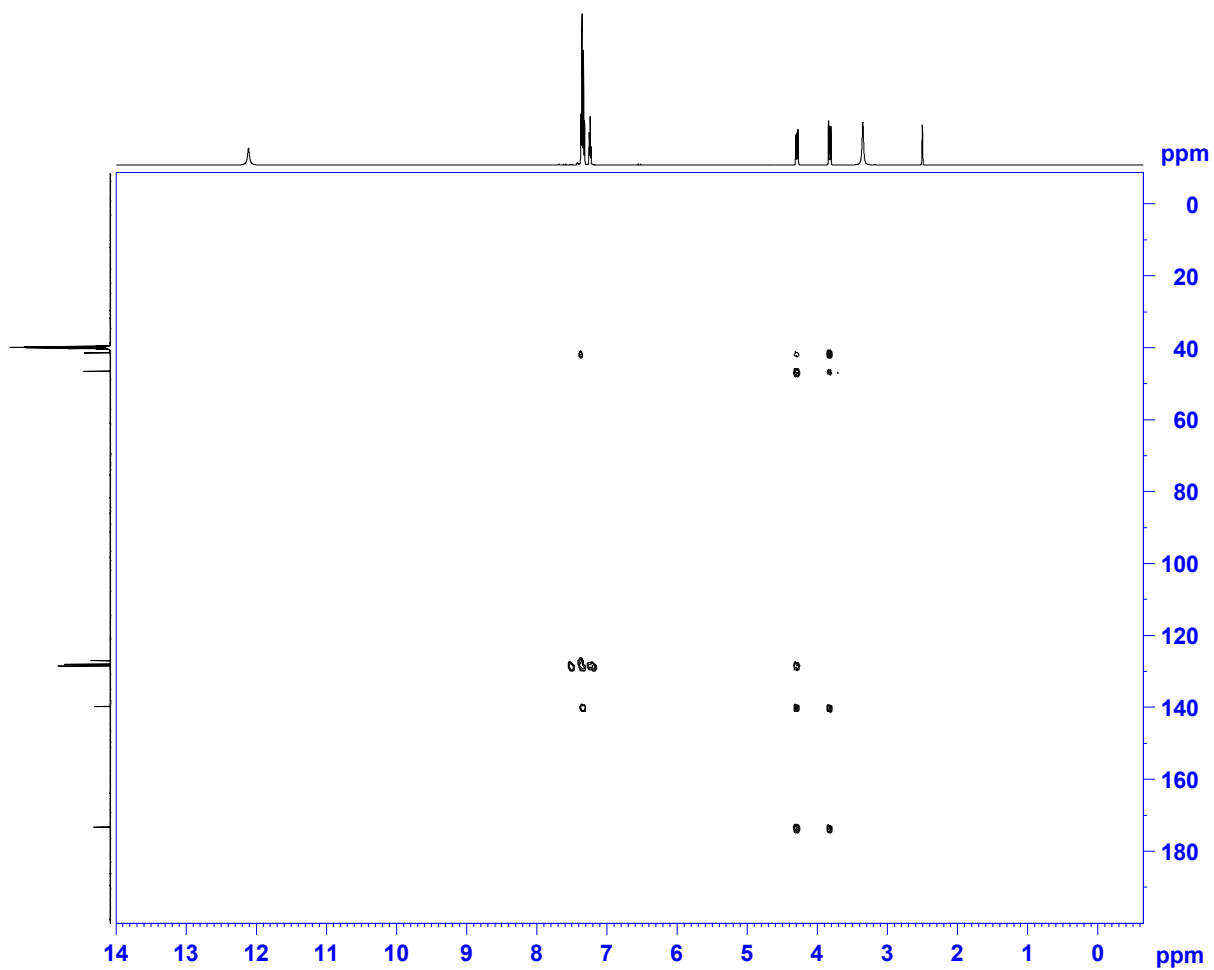

**Figure S5 Continue.** HMBC NMR spectrum of **CBDA-1** in DMSO-*d*<sub>6</sub> at room temperature.

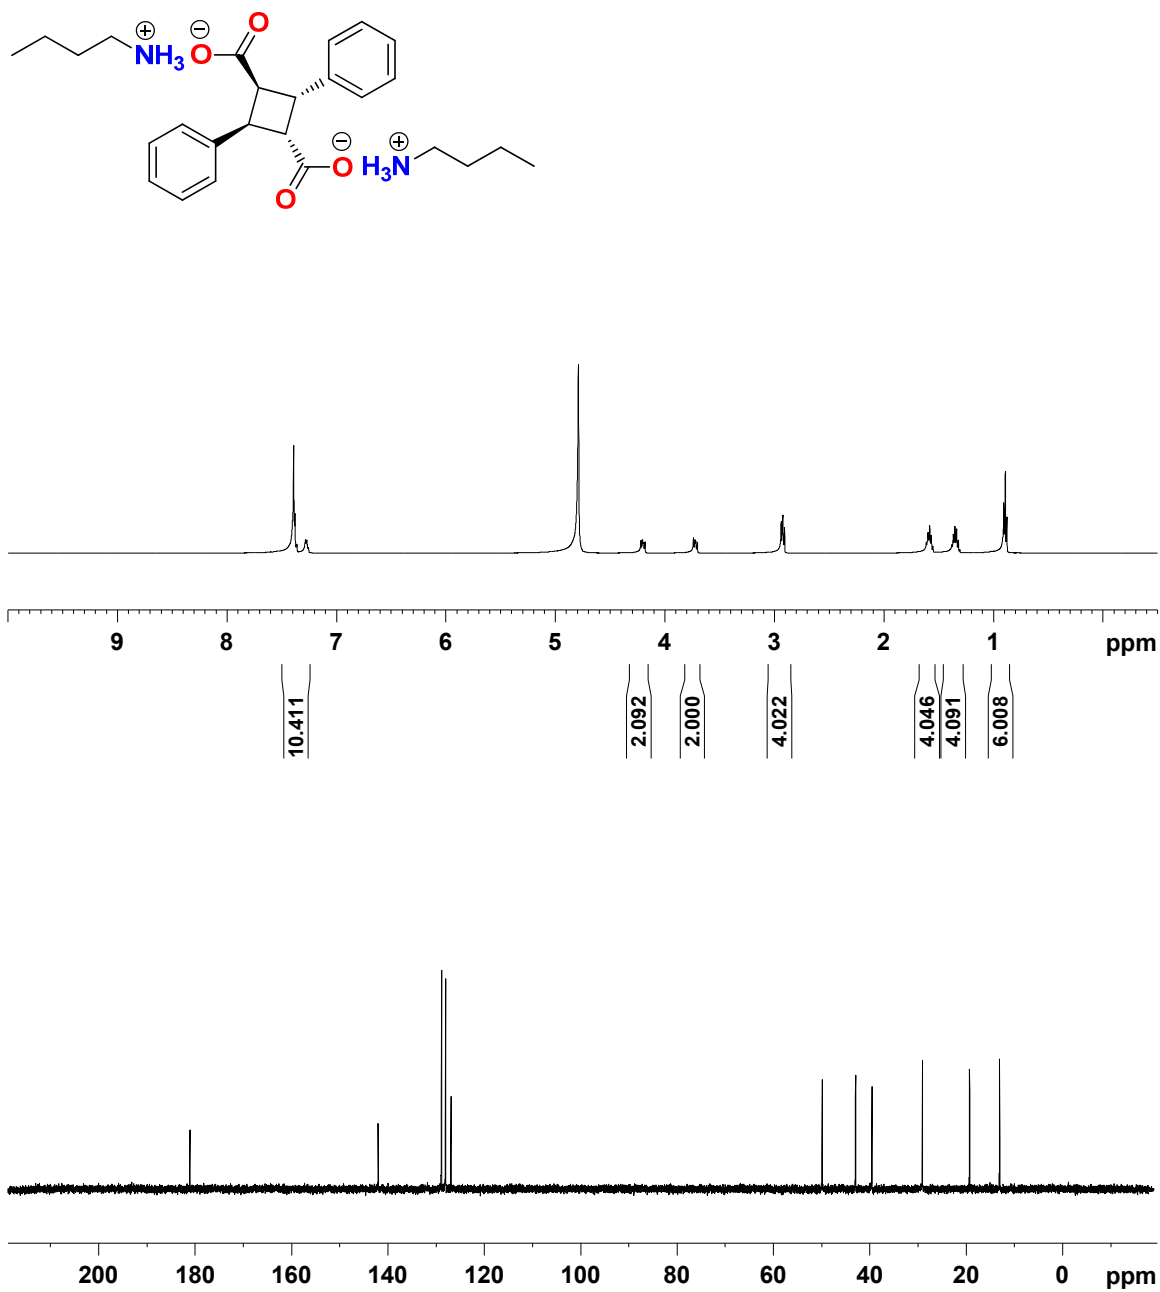

**Figure S6.** <sup>1</sup>H and <sup>13</sup>C NMR spectra of **CBDA-1** dibutylammonium salt in D<sub>2</sub>O at room temperature.

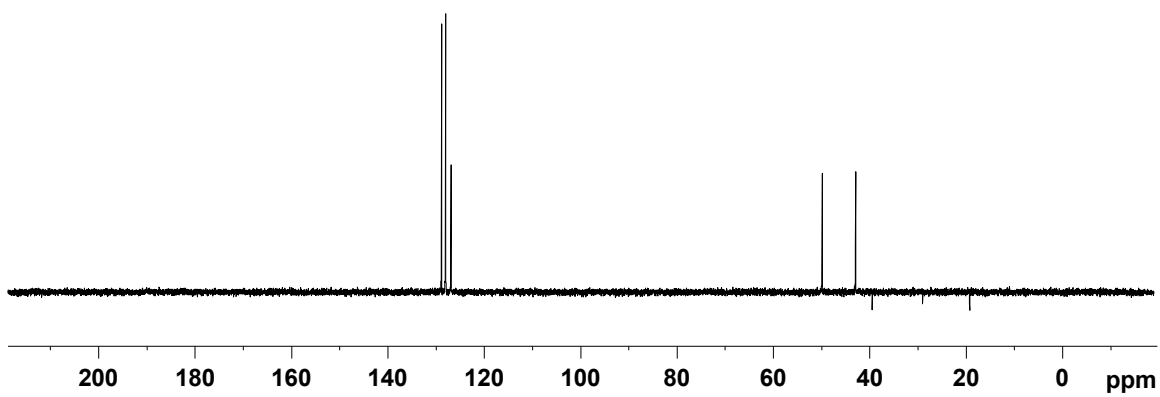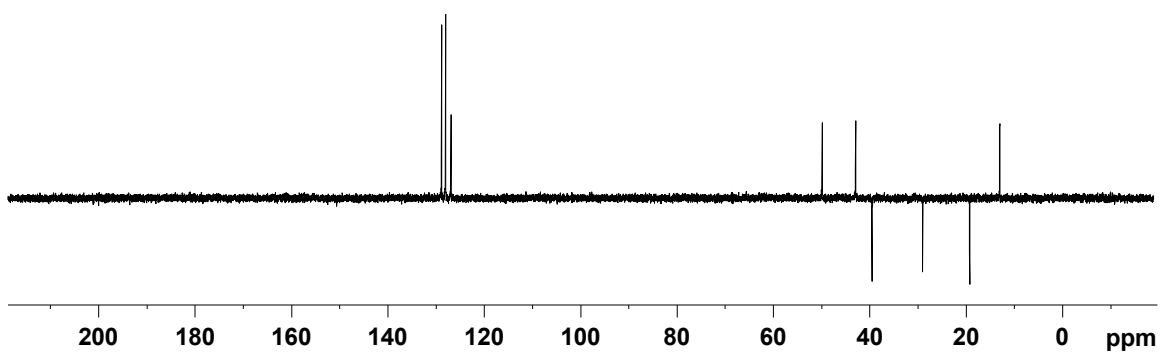

**Figure S6 continue.** DEPT 90 and DEPT 135 NMR spectra of **CBDA-1** dibutylamminium in D<sub>2</sub>O at room temperature.

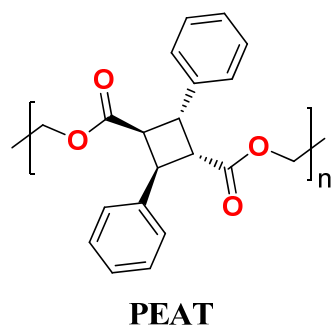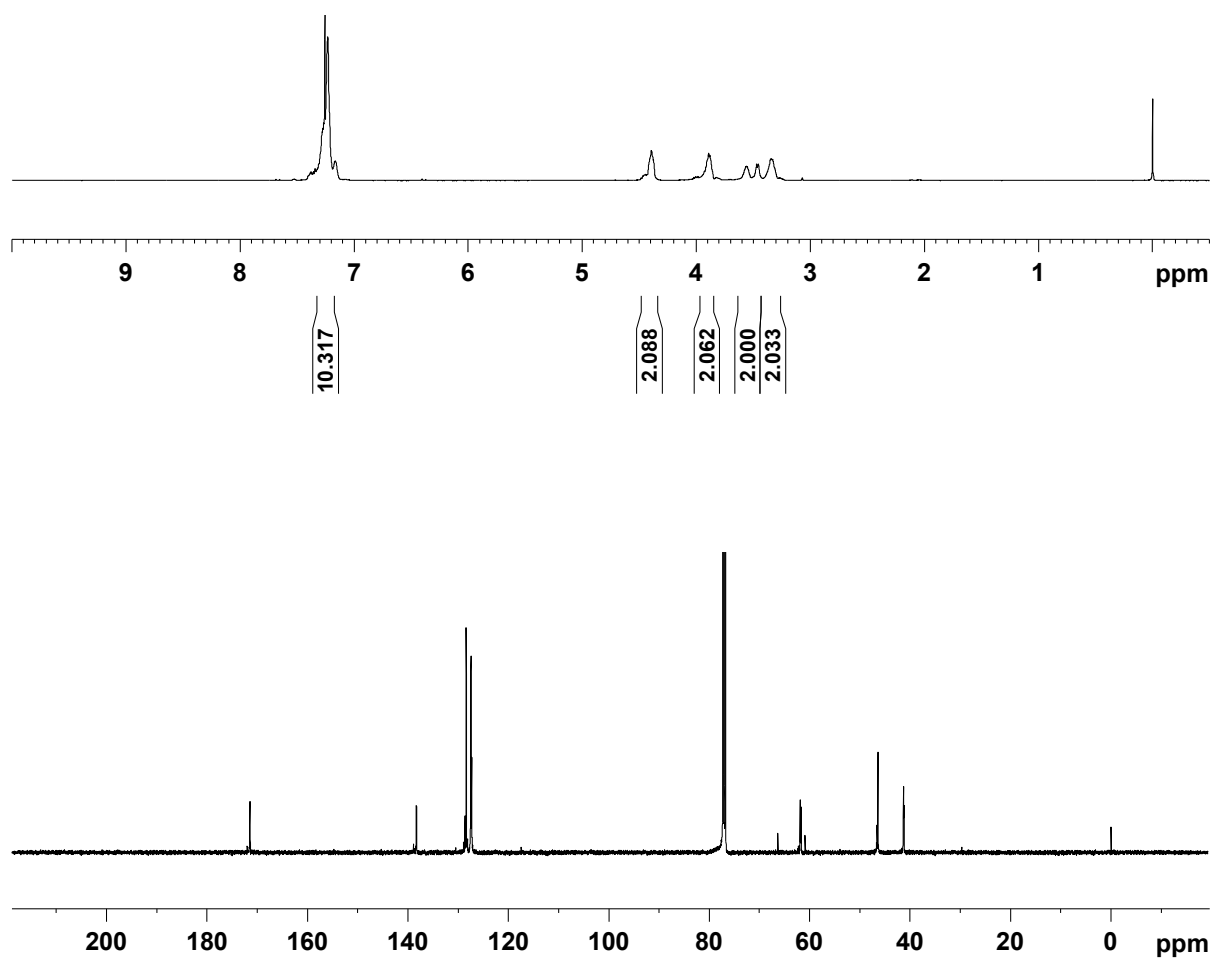

**Figure S7.**  $^1\text{H}$  (a) and  $^{13}\text{C}$  (b) NMR spectra of PEAT in  $\text{CDCl}_3$  at room temperature.

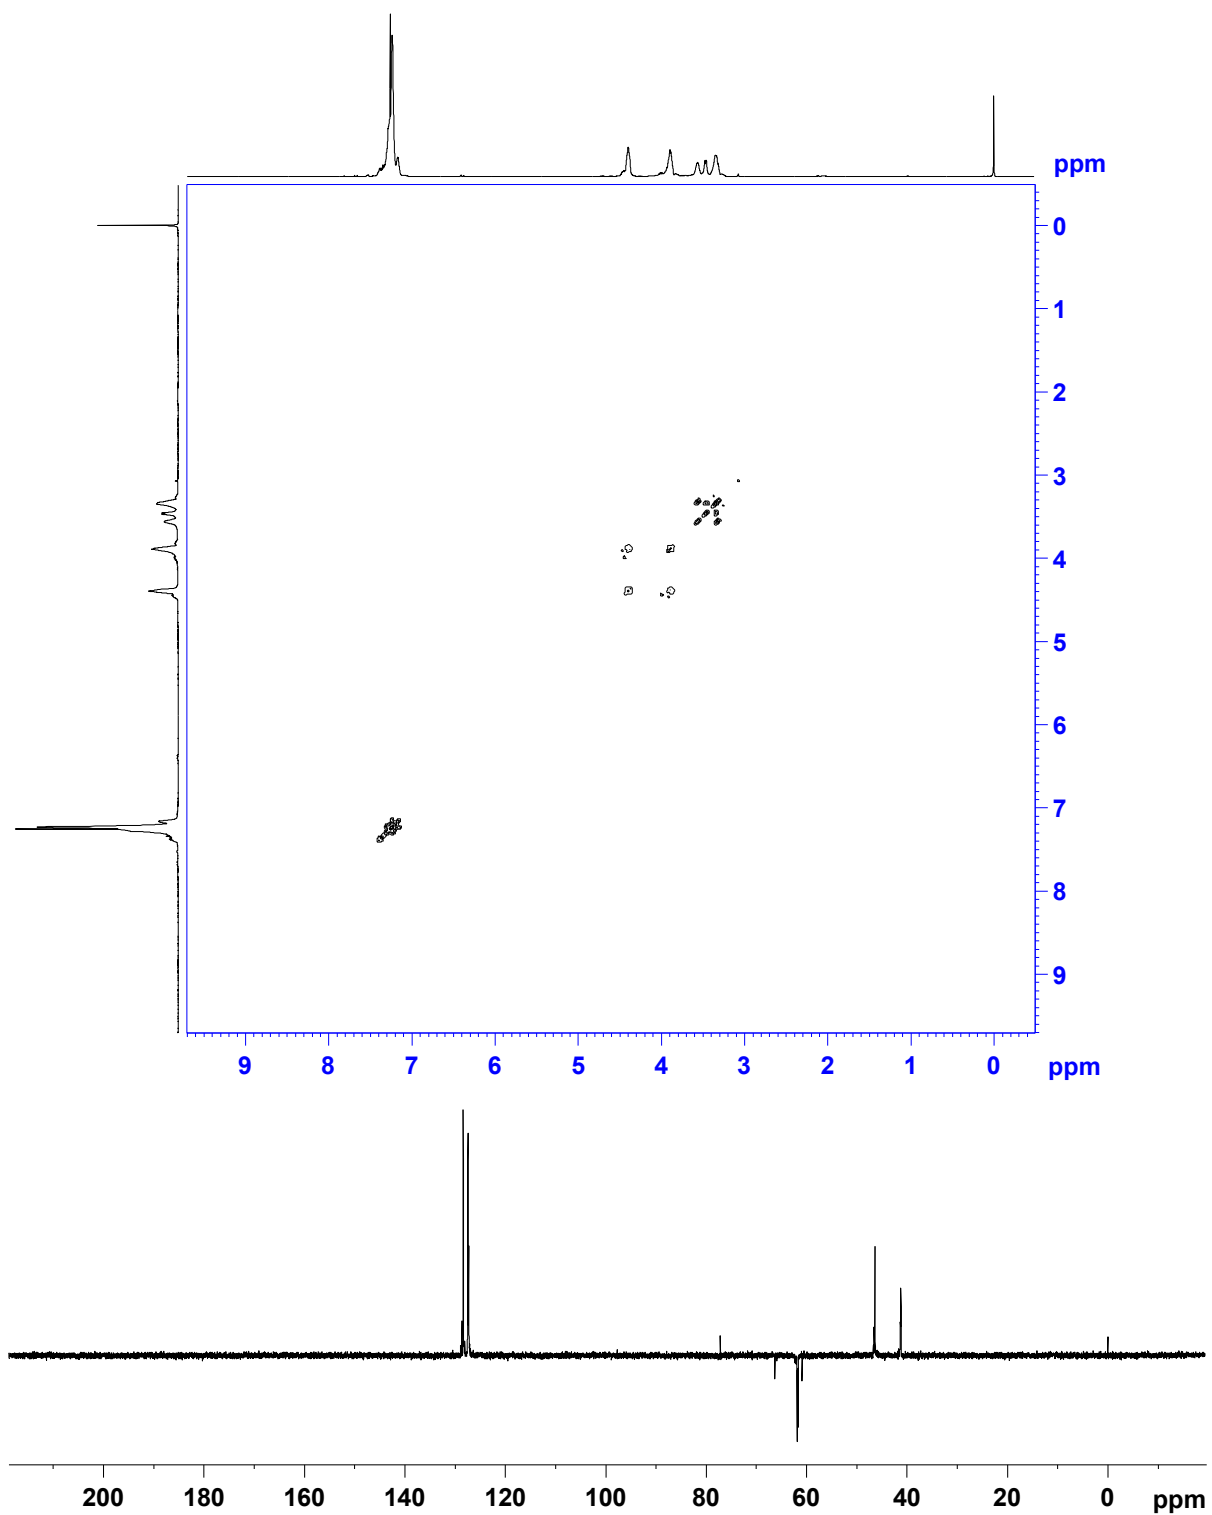

**Figure S7 continue.** <sup>1</sup>H COSY (c) and <sup>13</sup>C DEPT 135 (d) NMR spectra of PEAT in CDCl<sub>3</sub> at room temperature.



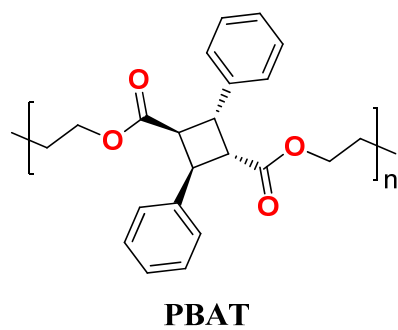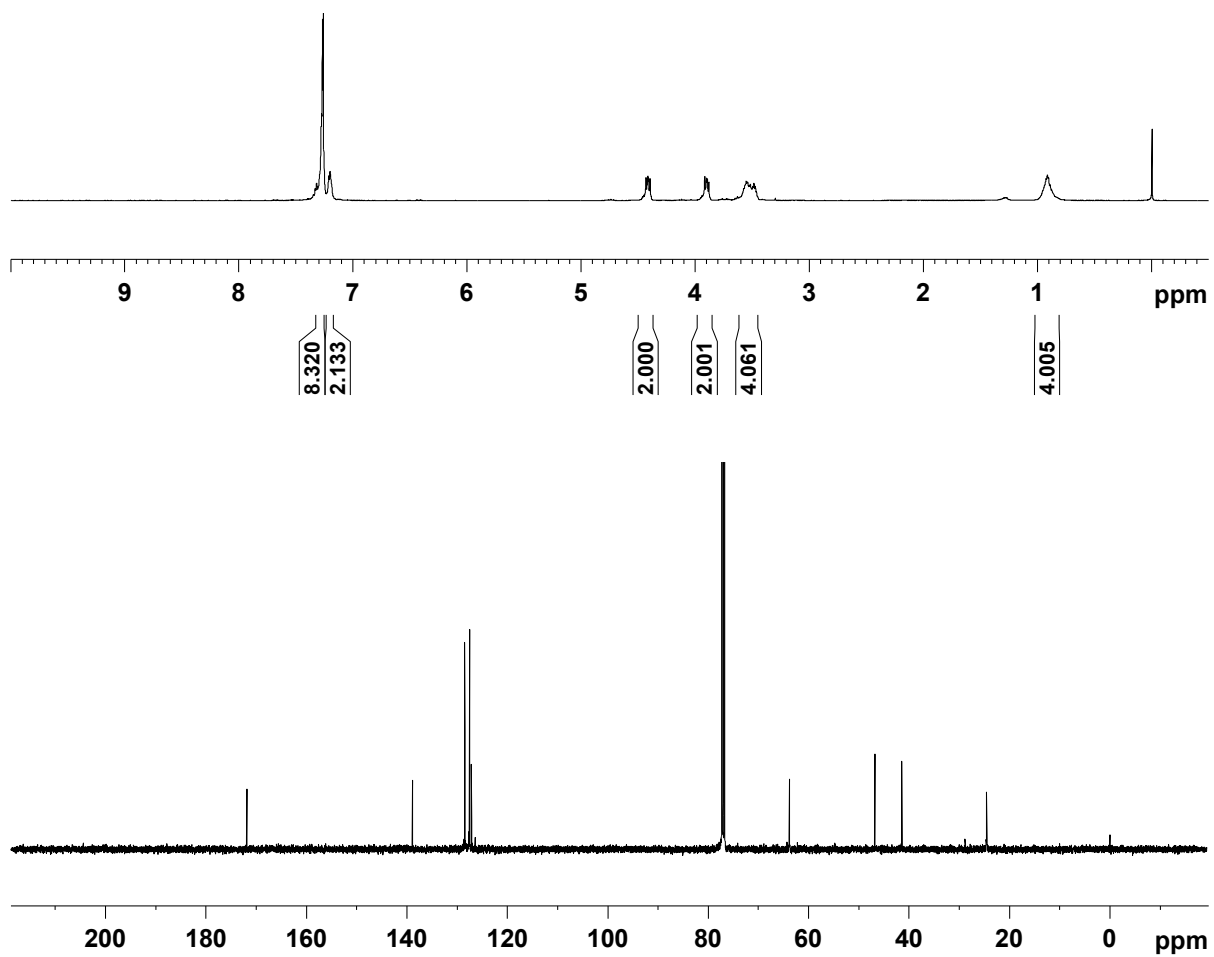

**Figure S8.**  $^1\text{H}$  (a) and  $^{13}\text{C}$  (b) NMR spectra of PBAT in  $\text{CDCl}_3$  at room temperature.

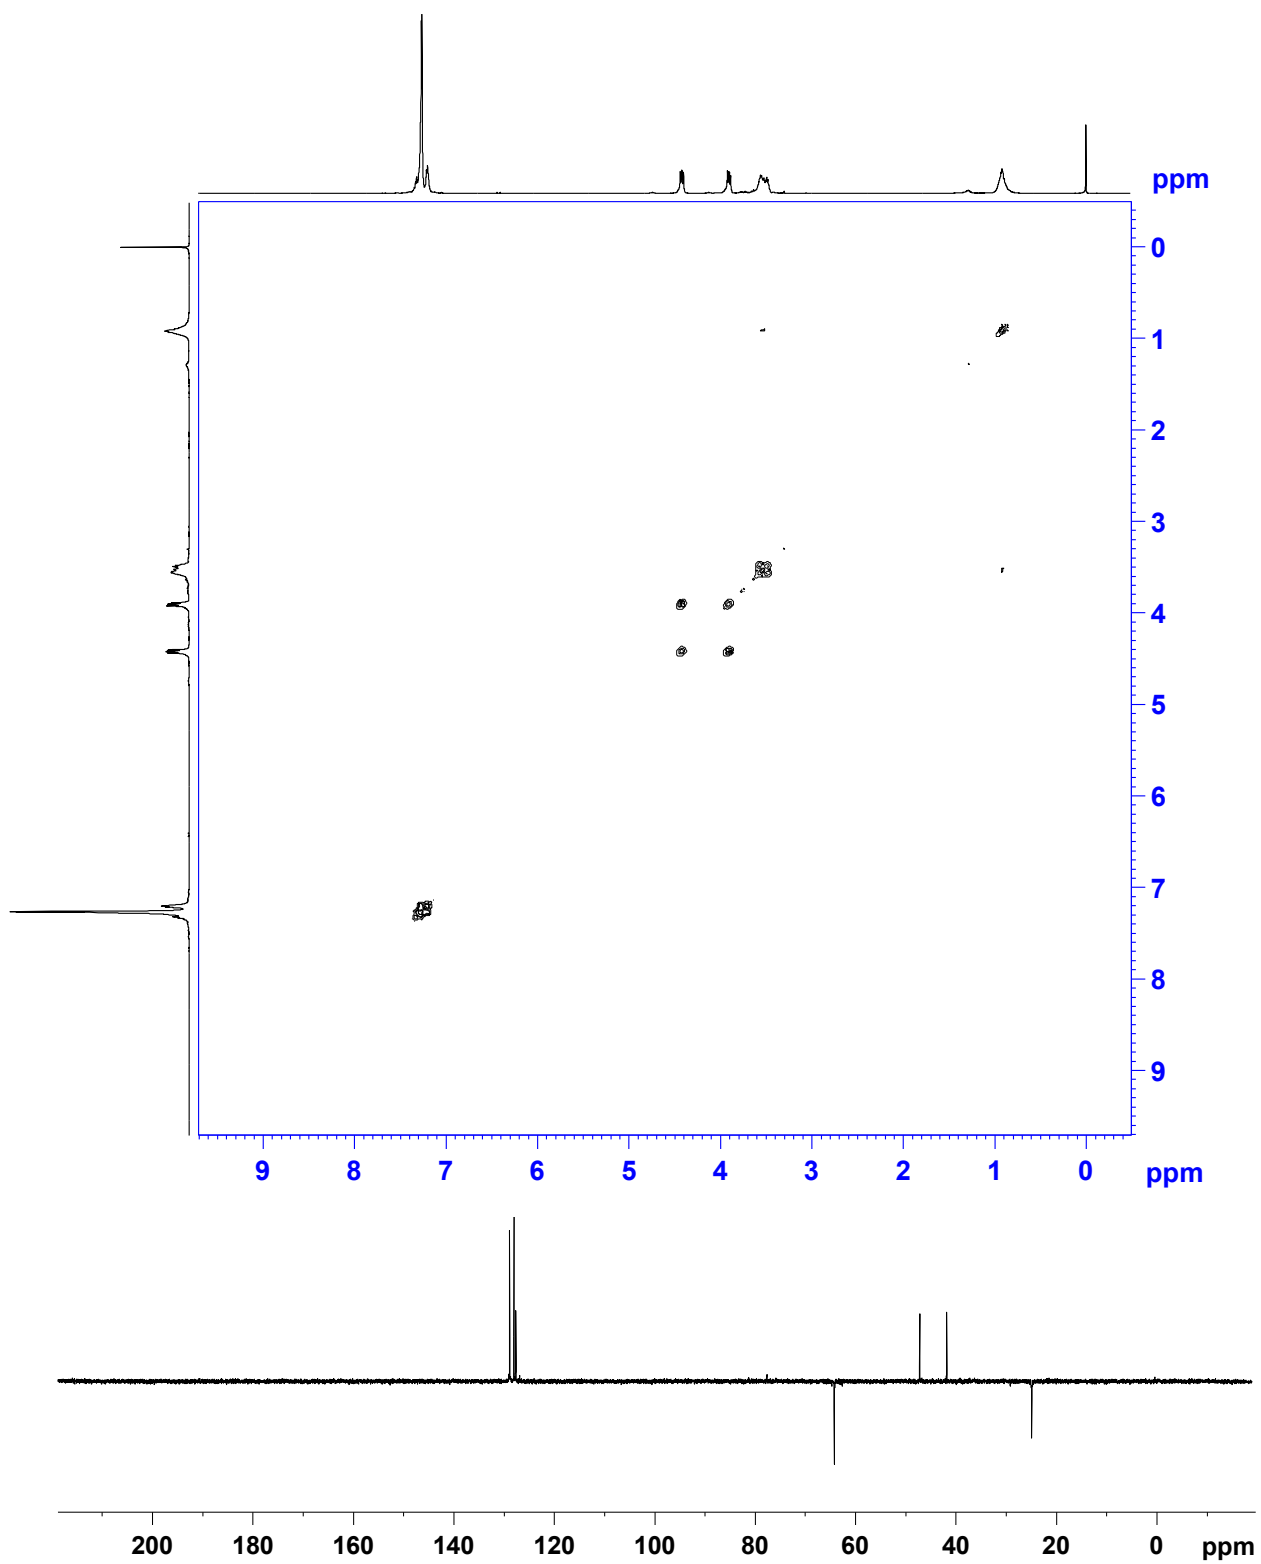

**Figure S8 continue.** <sup>1</sup>H COSY (c) and <sup>13</sup>C DEPT 135 (d) NMR spectra of PBAT in CDCl<sub>3</sub> at room temperature.

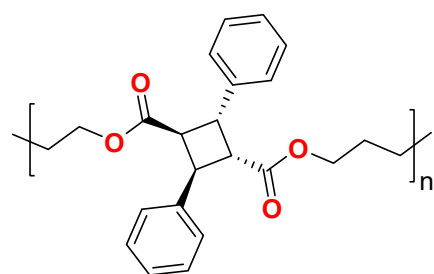

PPAT

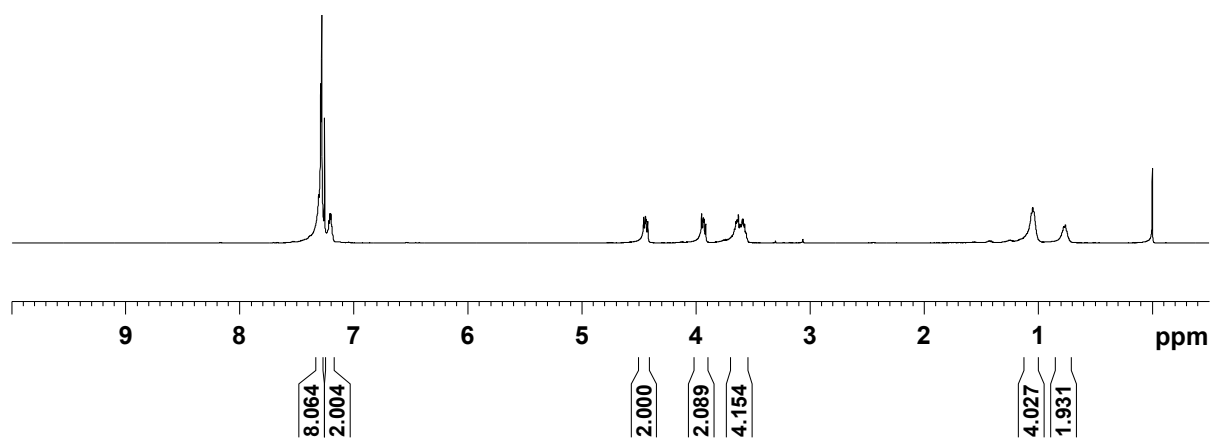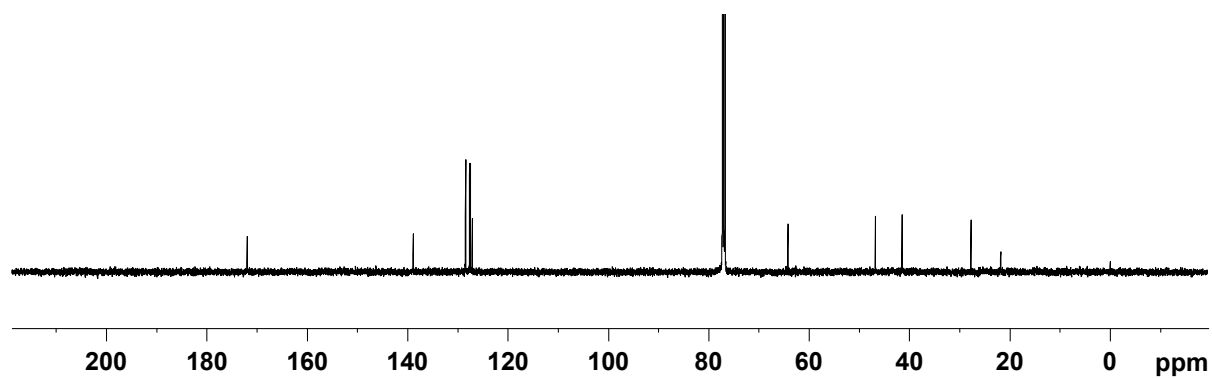

Figure S9.  $^1\text{H}$  (a) and  $^{13}\text{C}$  (b) NMR spectra of PPAT in  $\text{CDCl}_3$  at room temperature.

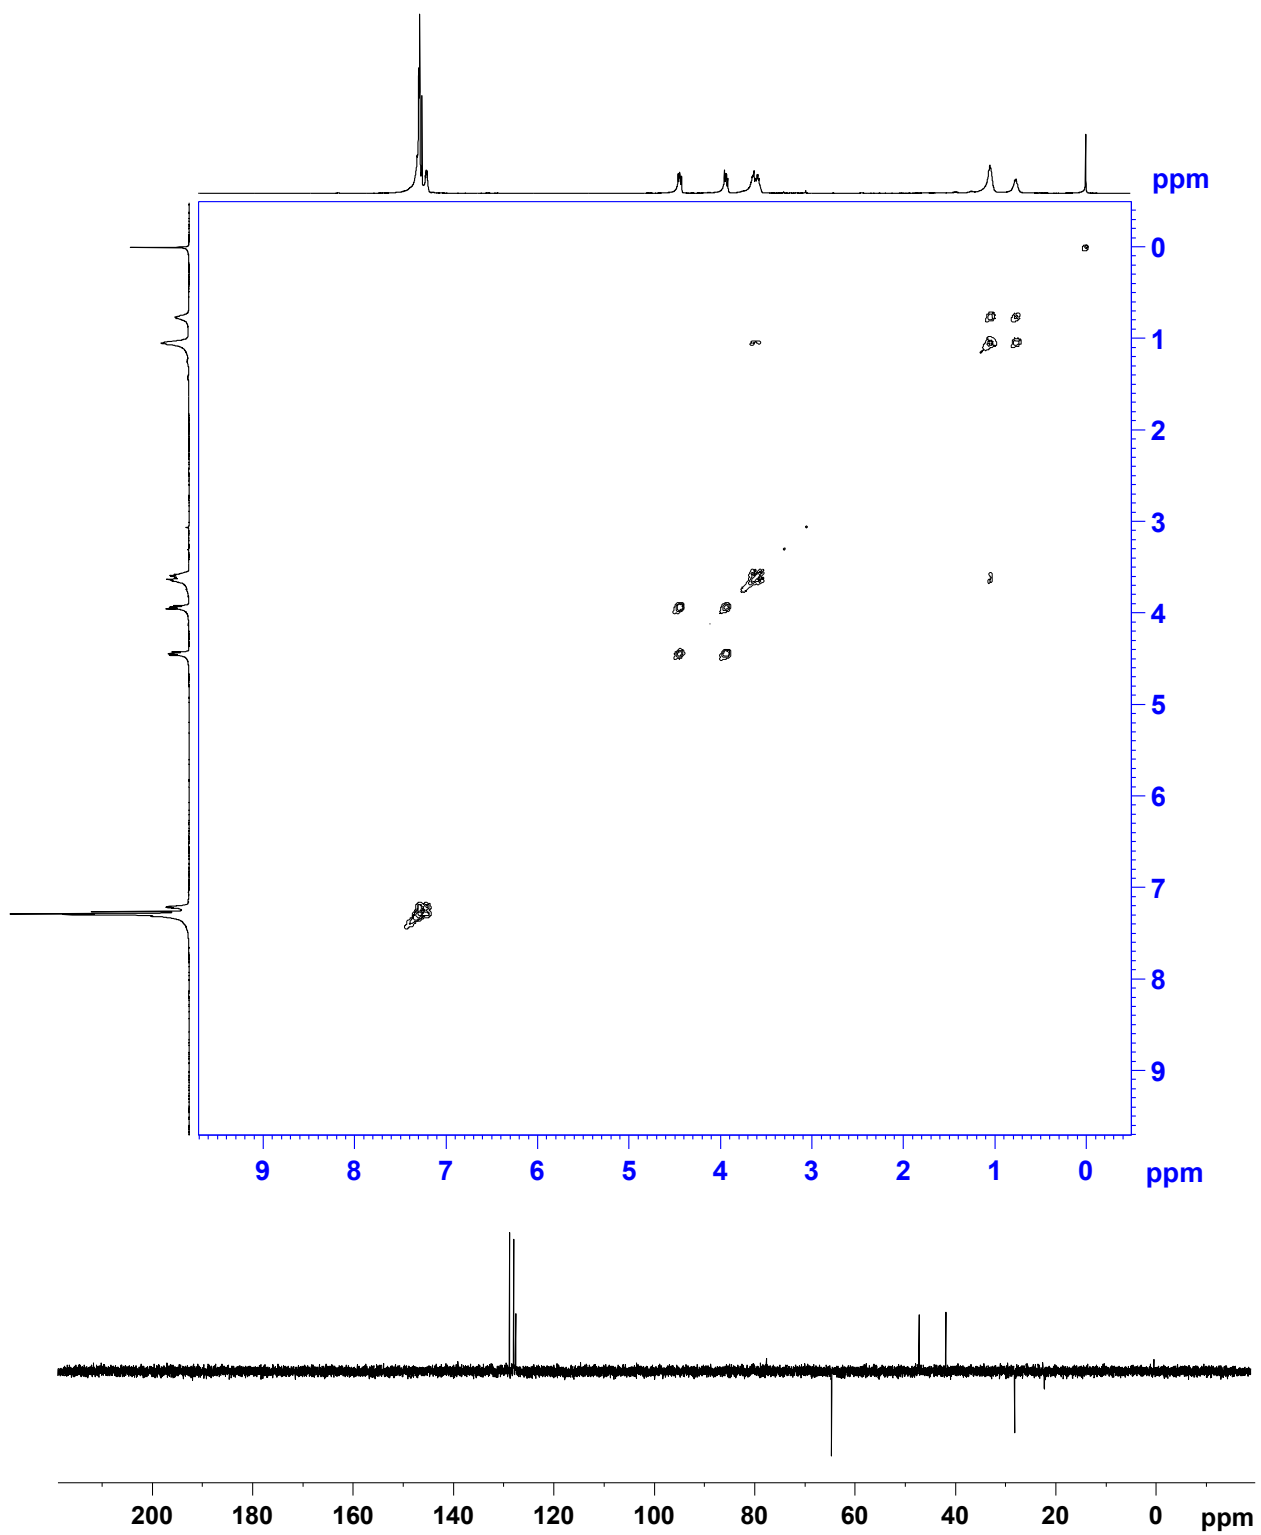

**Figure S9 continue.** <sup>1</sup>H COSY (c) and <sup>13</sup>C DEPT 135 (d) NMR spectra of PPAT in CDCl<sub>3</sub> at room temperature.

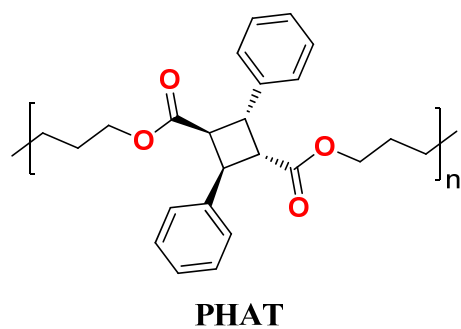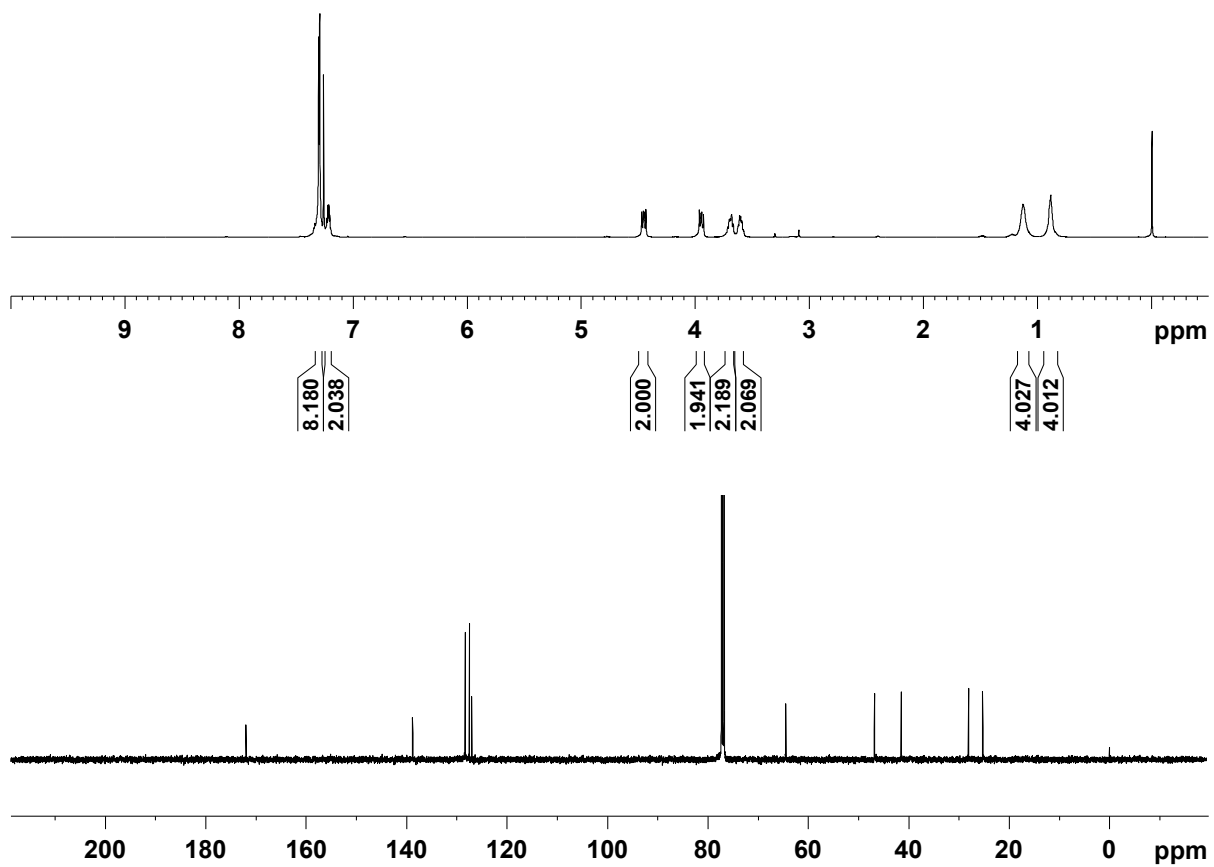

**Figure S10.**  $^1\text{H}$  (a) and  $^{13}\text{C}$  (b) NMR spectra of PHAT in  $\text{CDCl}_3$  at room temperature.

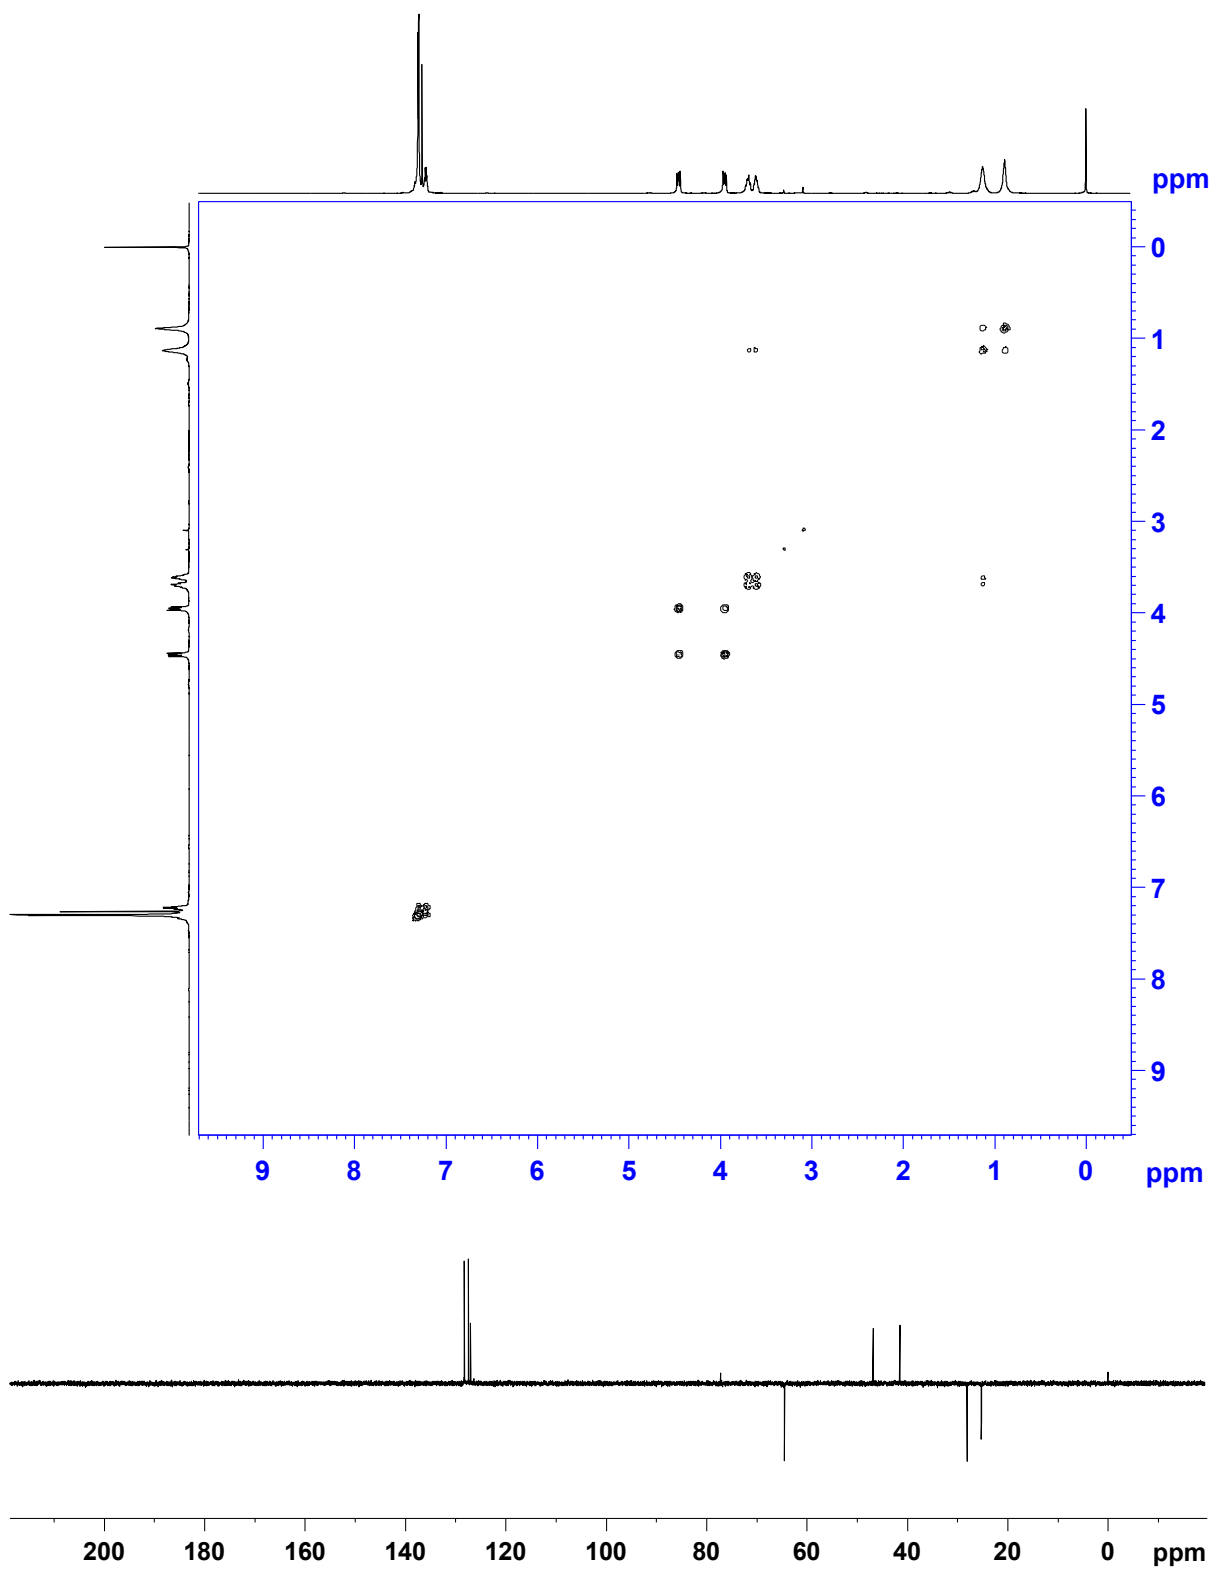

**Figure S10 continue.** <sup>1</sup>H COSY (a) and <sup>13</sup>C DEPT 135 (b) NMR spectra of PHAT in CDCl<sub>3</sub> at room temperature.

### 3.4. FT-IR of $\alpha$ -Truxillic Acid and Poly- $\alpha$ -Truxillates

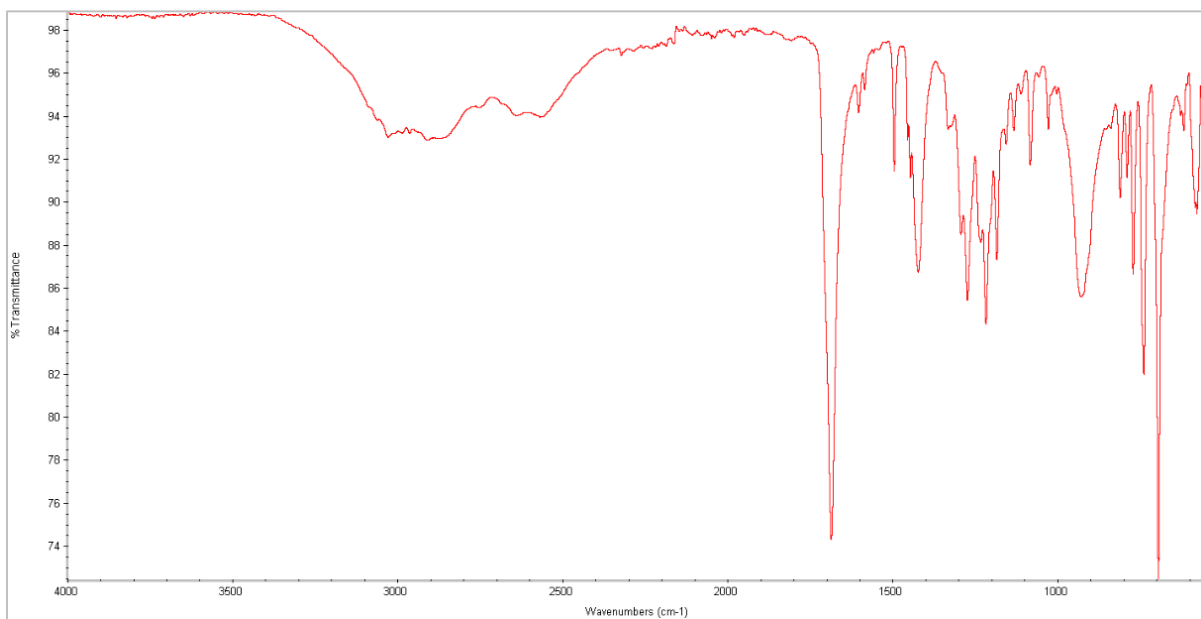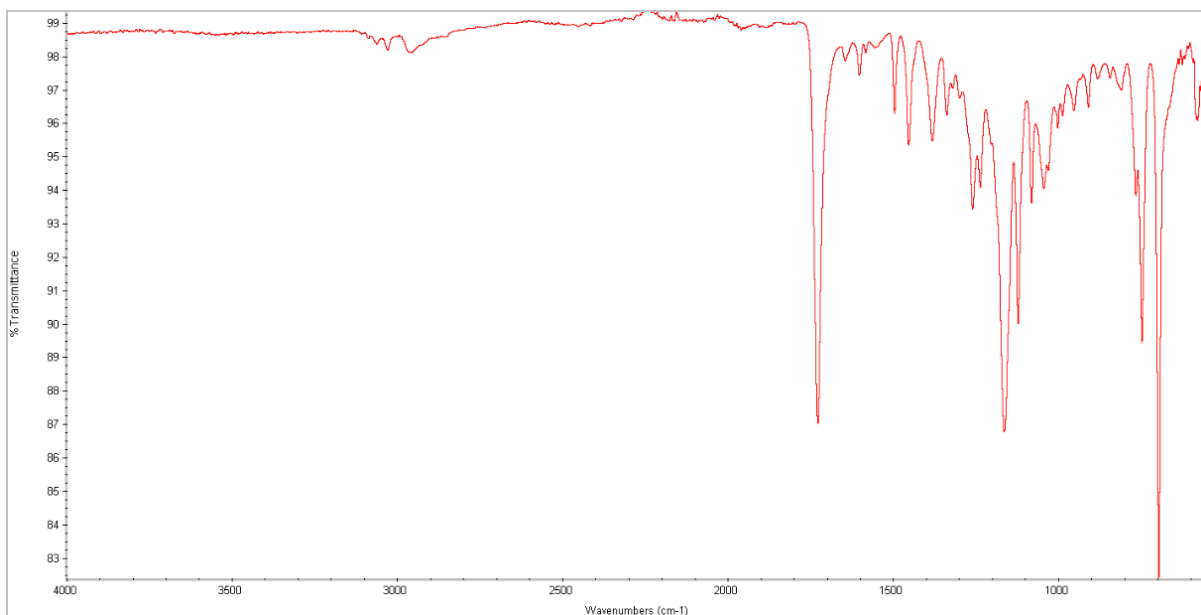

**Figure S11.** The FT-IR spectra of CBDA-1 (up,  $\alpha$ -truxillic acid) and PEAT (down).

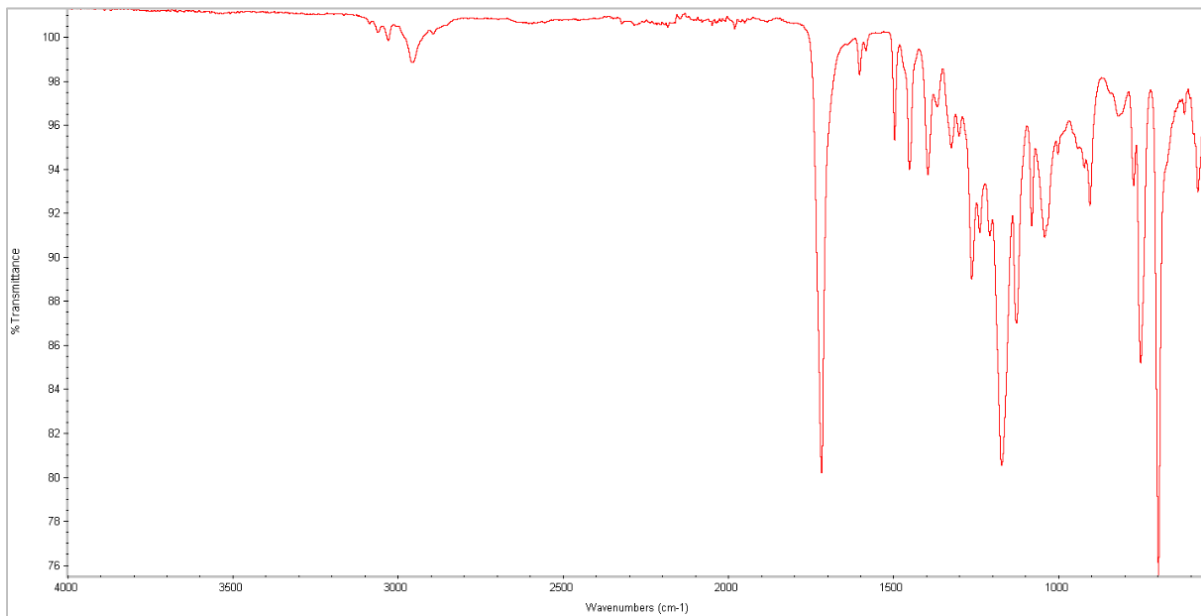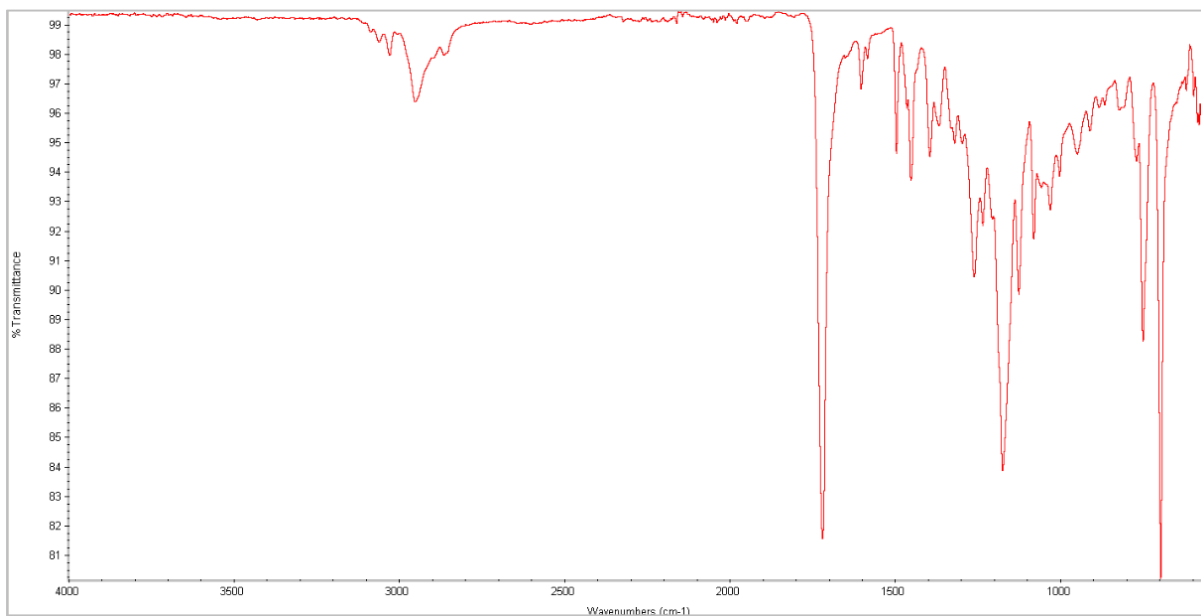

**Figure S11 continue.** The FT-IR spectra of PBAT (up) and PPAT (down).



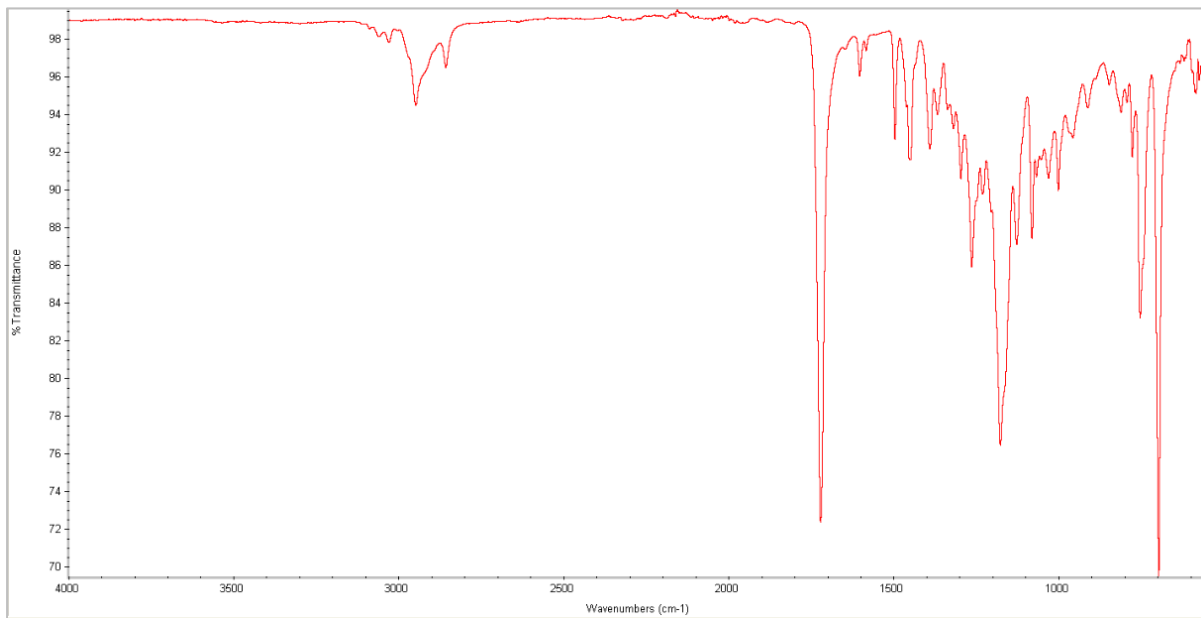

**Figure S11 continue.** The FT-IR spectrum of PHAT.

### 3.5. Powder X-ray Diffraction of Poly- $\alpha$ -Truxillates

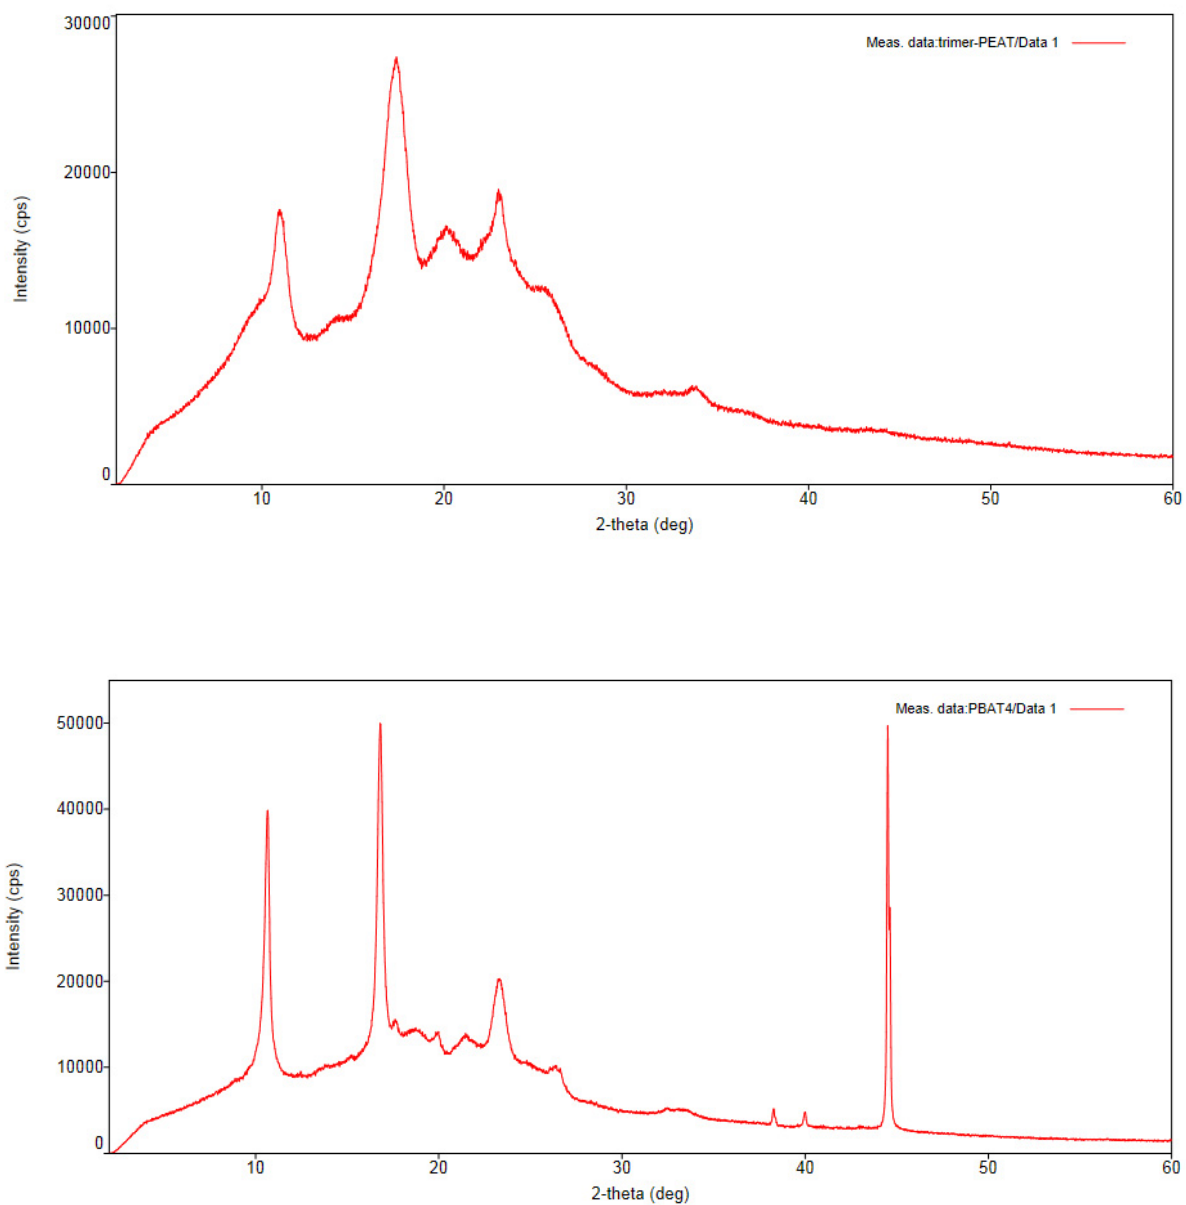

**Figure S12.** Powder X-ray diffraction (PXRD) patterns of PEAT (up) and PBAT (down). The results indicated a partially crystalline state.

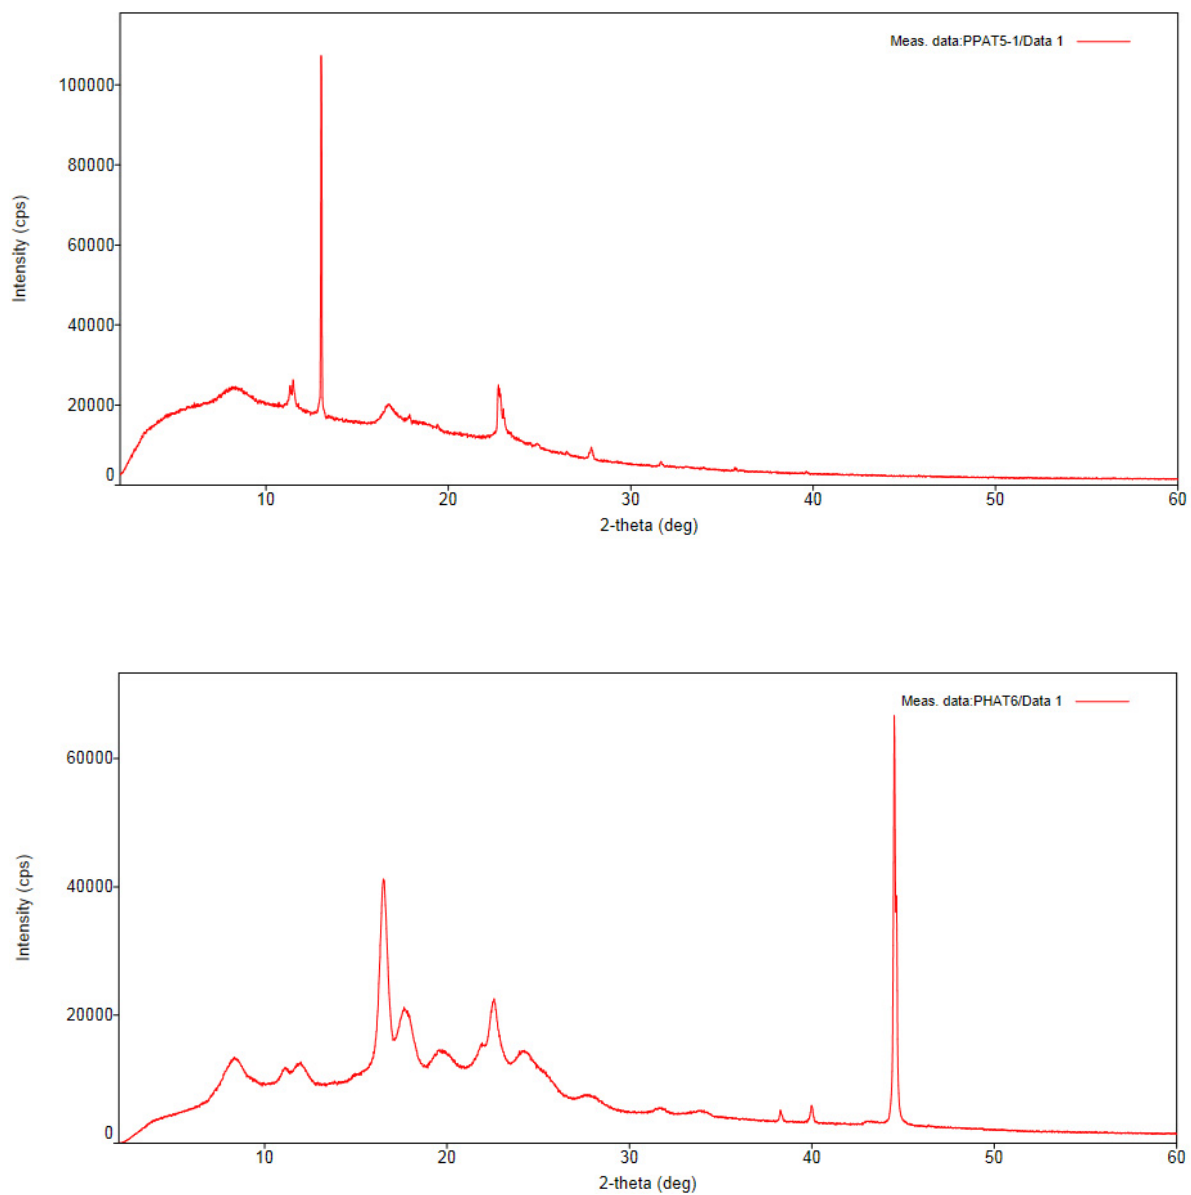

**Figure S12 Continue.** Powder X-ray diffraction (PXRD) patterns of PPAT (up) and PHAT (down). The results indicated a partially crystalline state.

### 3.6. MS Spectra

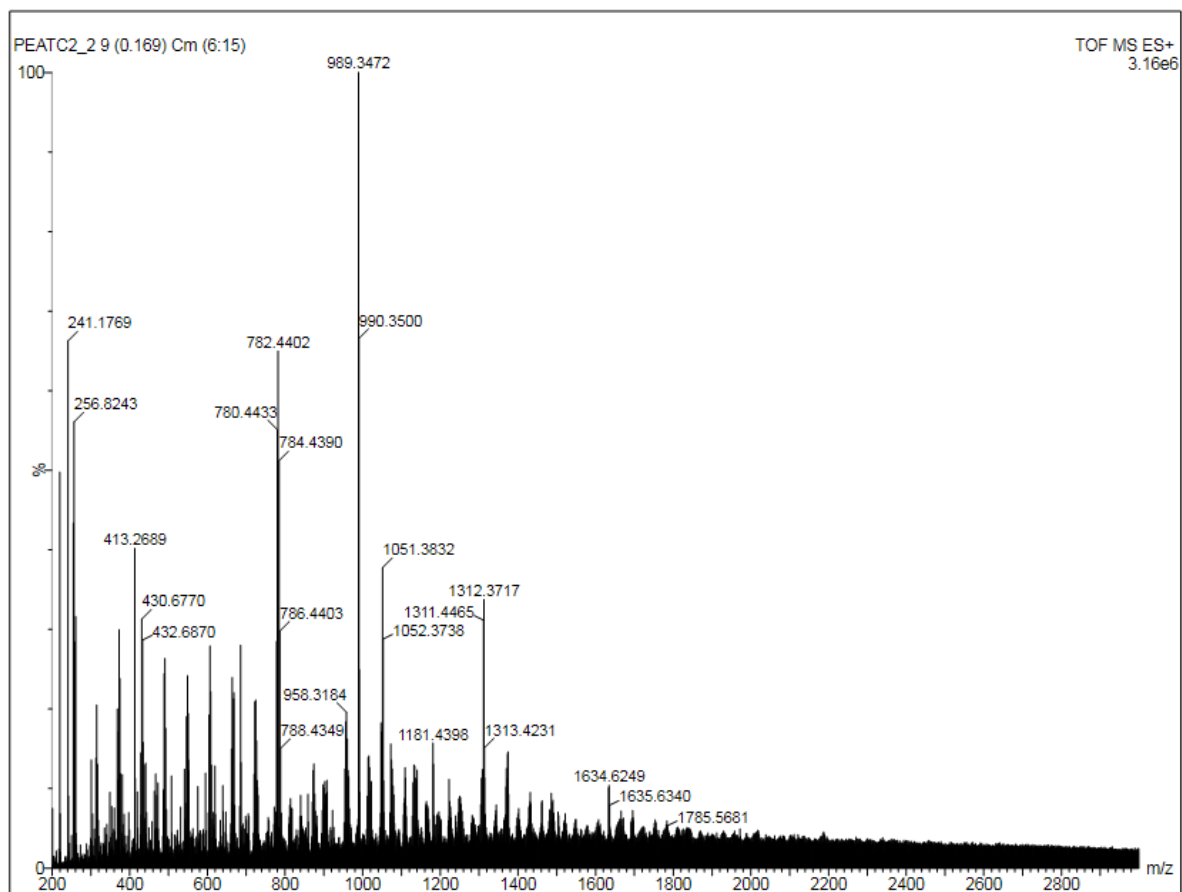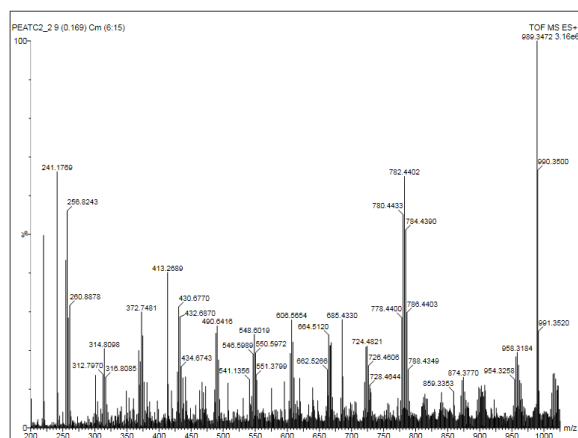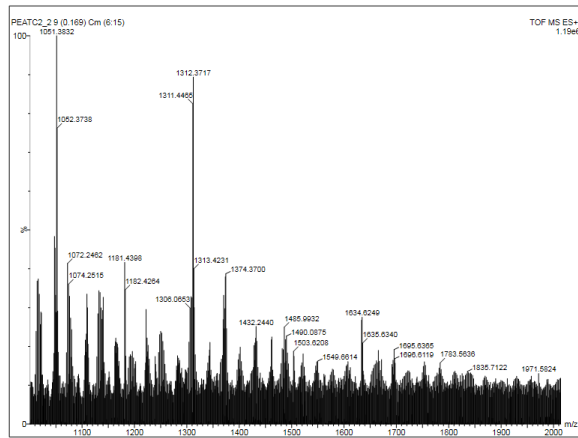

Figure 13. MS spectra of PEAT.

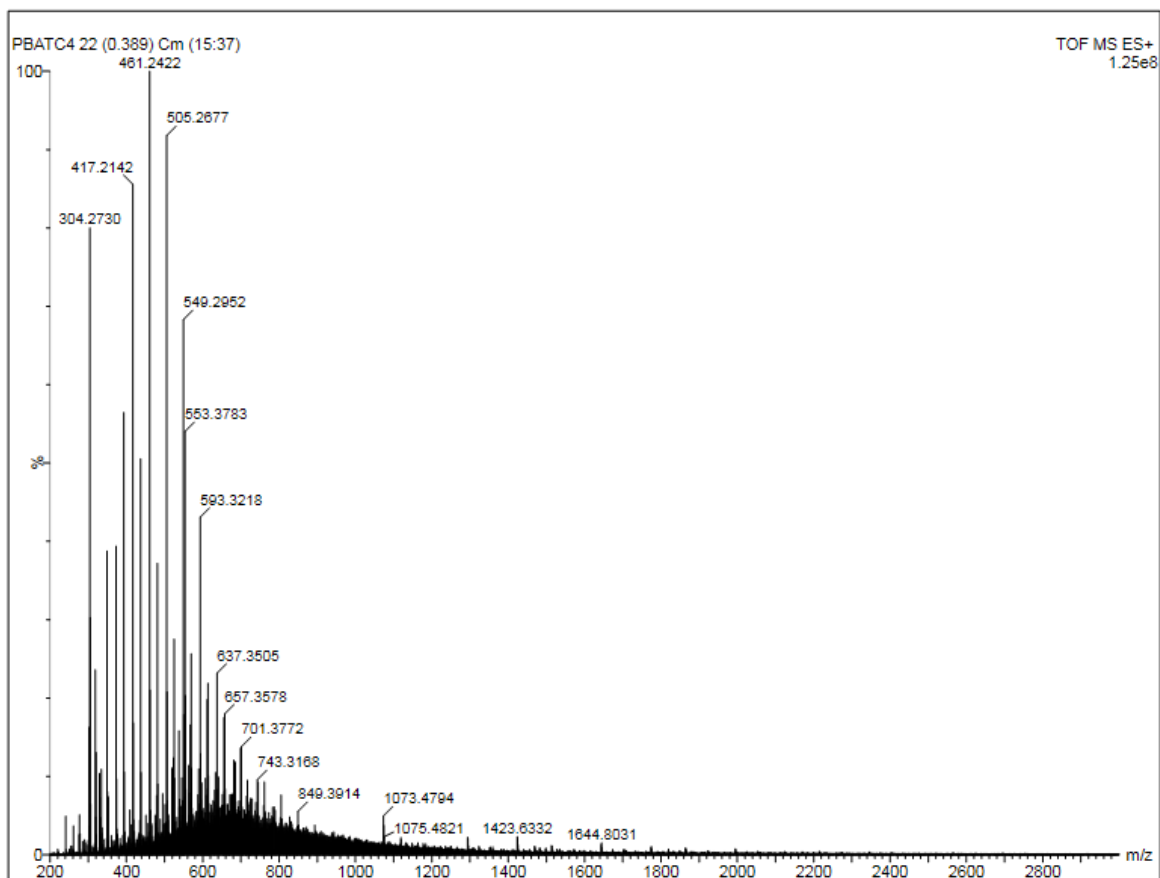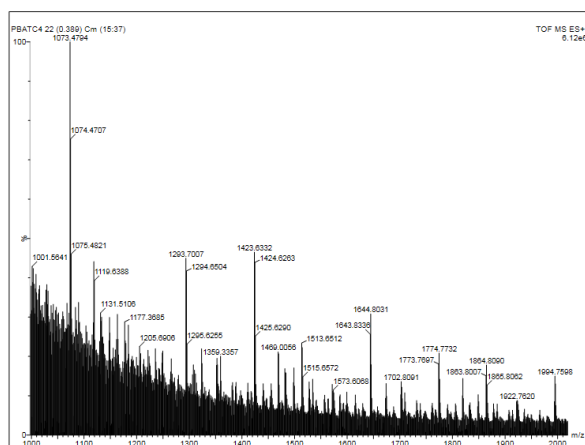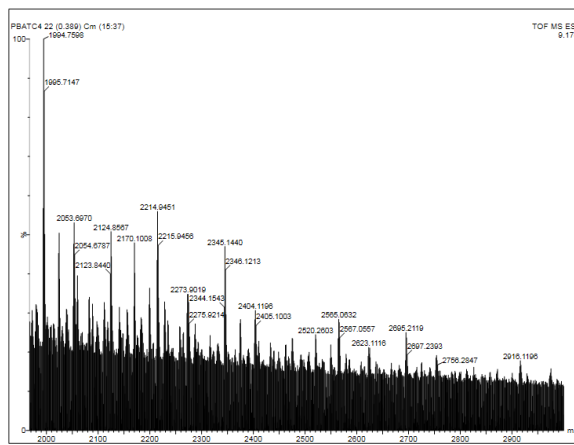

Figure 14. MS spectra of PBAT.

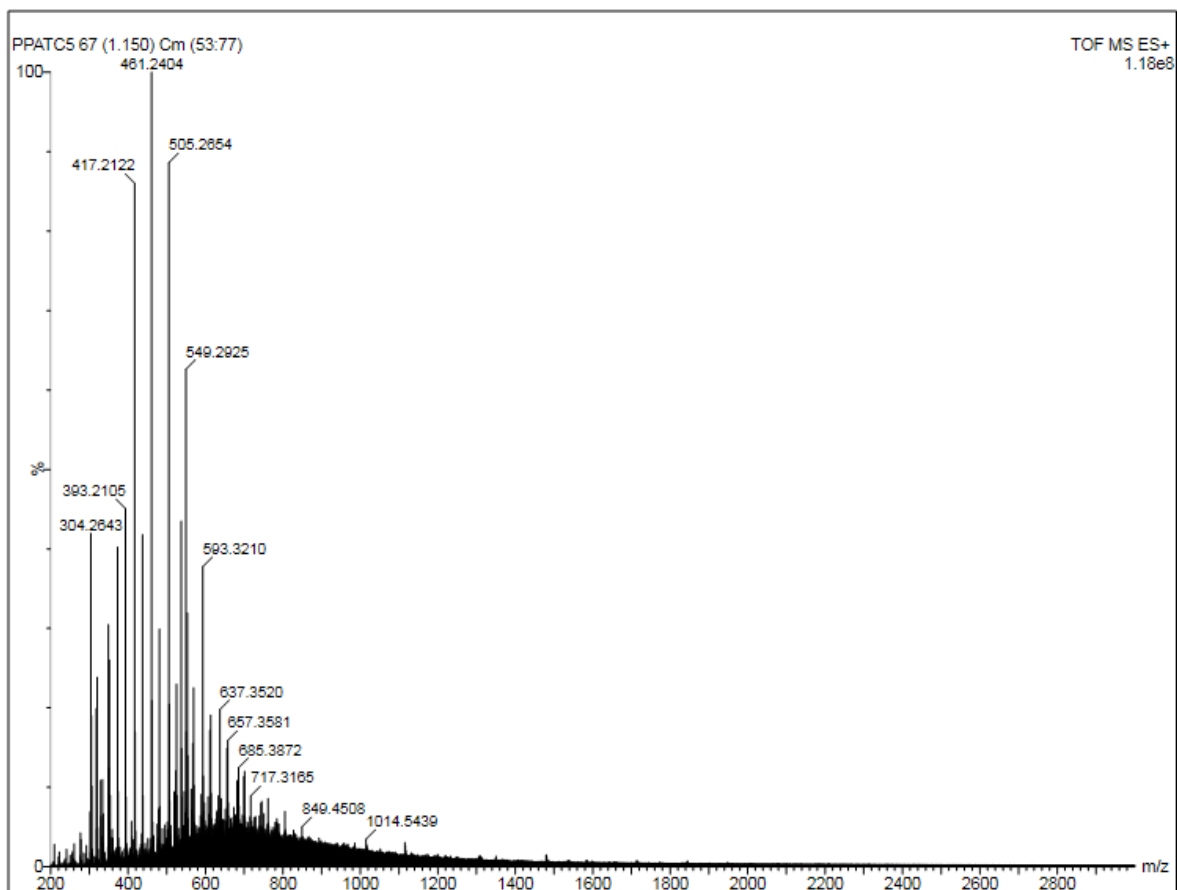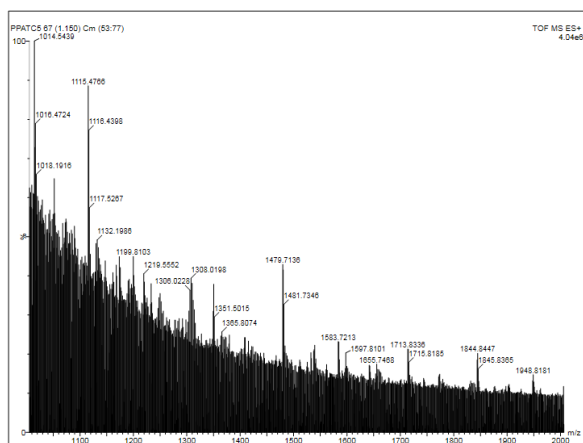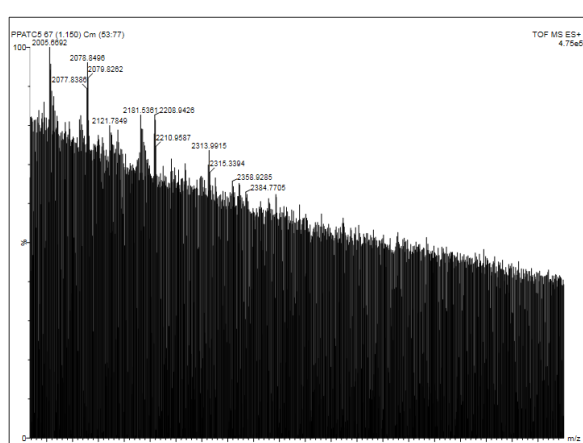

Figure 15. MS spectra of PPAT.

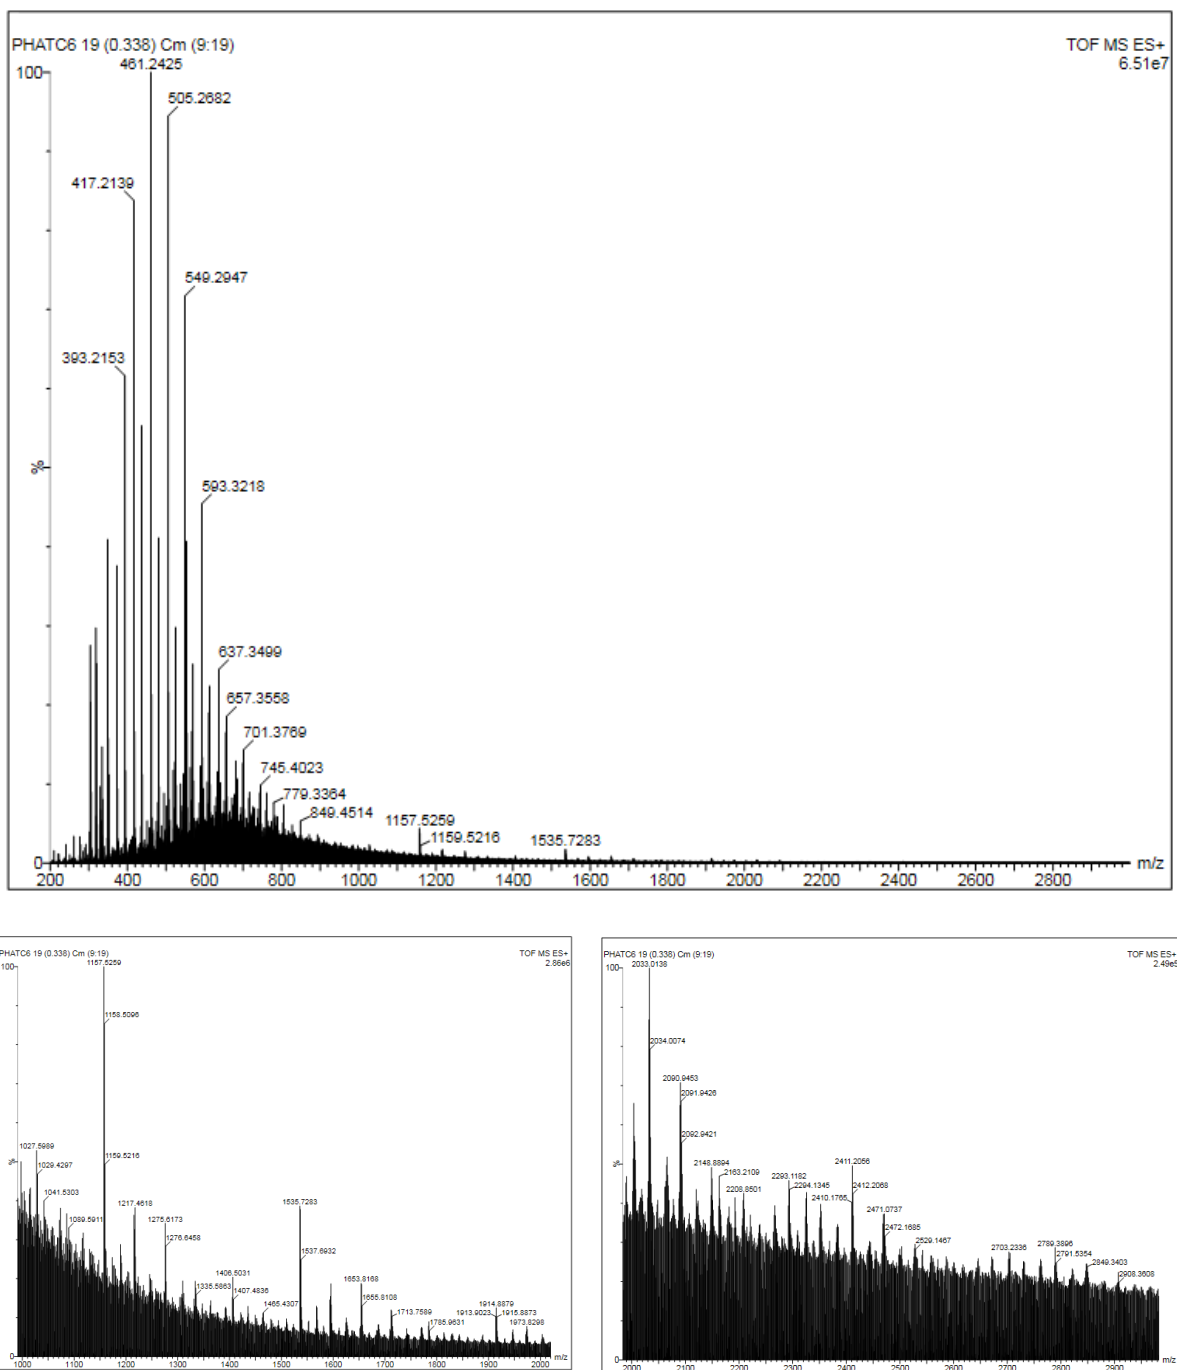

Figure 16. MS spectra of PHAT.

### 3.7. DSC

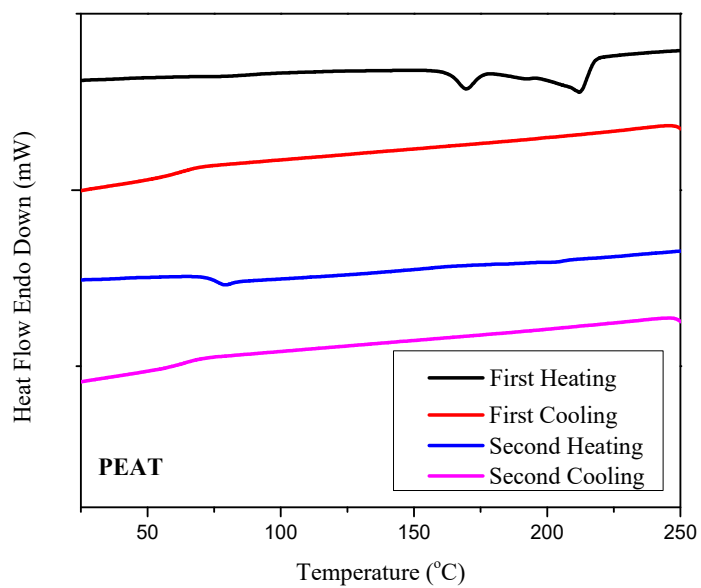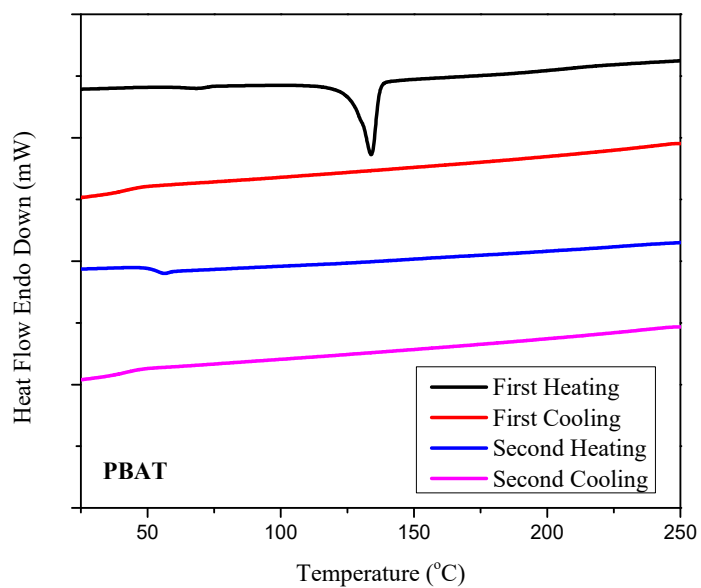

**Figure S17.** DSC results of PEAT and PBAT.



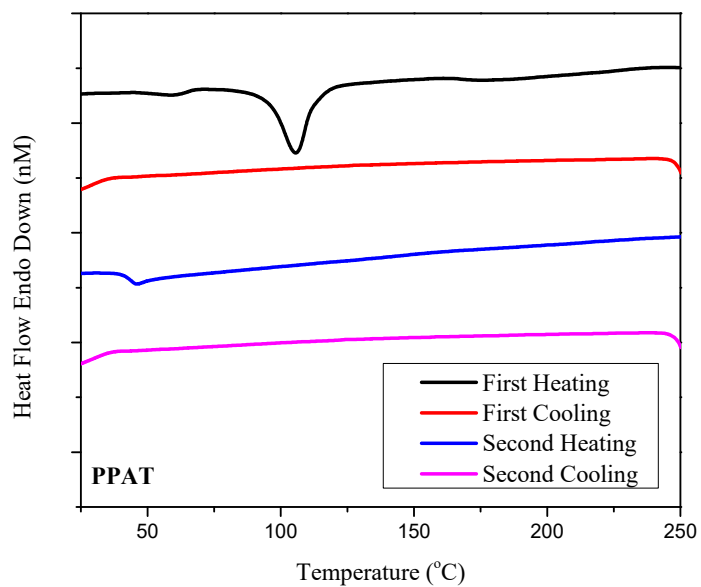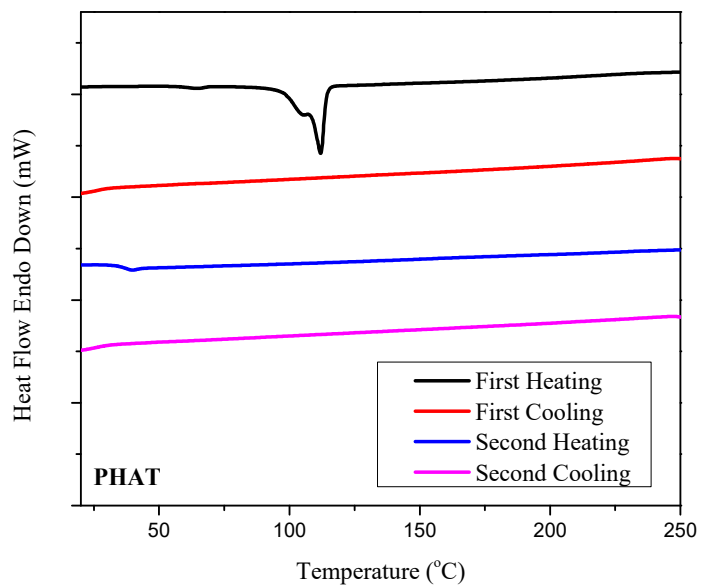

Figure S17 continue. DSC results of PPAT and PHAT.

### 3.8. TGA

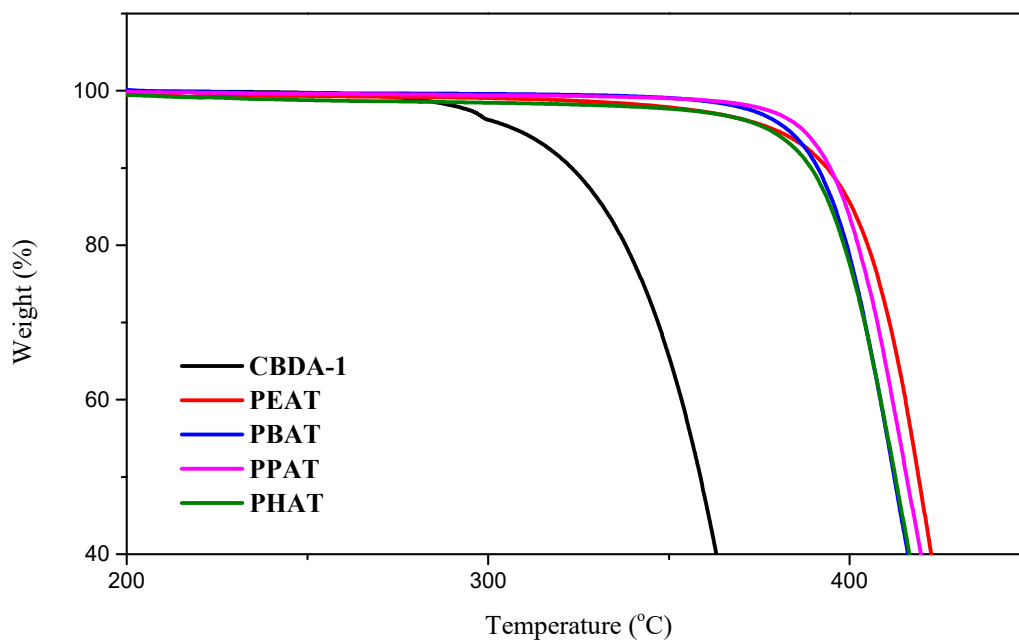

**Figure S18.** TGA of **CBDA-1** and poly- $\alpha$ -truxillate operated under nitrogen (50.0 ml/min) with rate 20 °C/min. To get a clear view, partial results were magnified. For full scale of TGA results, see the Figure 5 in the manuscript.

### 3.9. Polydispersity Indices (PDI)

**Table S2.** PDI of the poly- $\alpha$ -truxillates

| Poly- $\alpha$ -truxillates | PEAT | PBAT | PPAT | PHAT |
|-----------------------------|------|------|------|------|
| <b>PDI</b>                  | 1.88 | 1.47 | 1.57 | 1.85 |
